# Supplementary material
Source: ML conference proceedings conference paper supplement (https://openreview.net/forum?id=4shh1euUgx)

Confounder,  $w = 0.5$ , rank,  $\dim_c = 1$

$\dim_d = 1, n_c = 3$

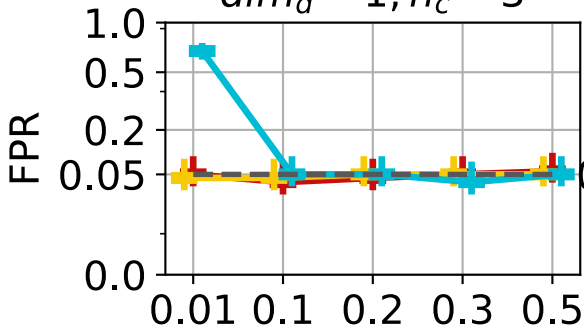

$\dim_d = 1, n_c = 4$

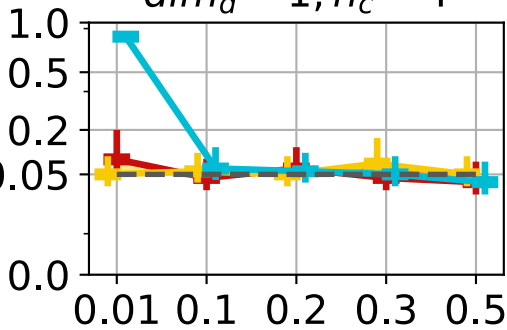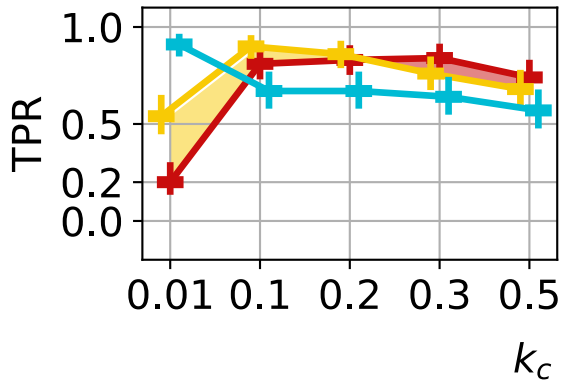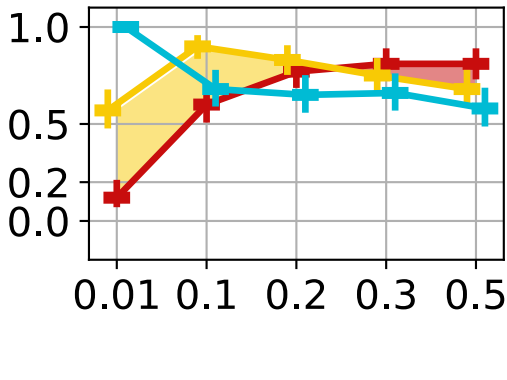

Supplement: supplementary_material [file attachment]

Independent  $Z$ ,  $w = 0.5$ , scaled (0, 1)

$dim_d = 1, n_c = 3$

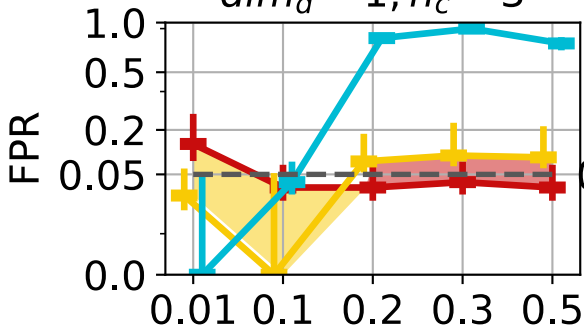

$dim_d = 1, n_c = 4$

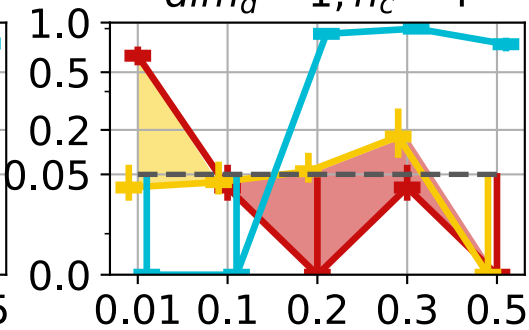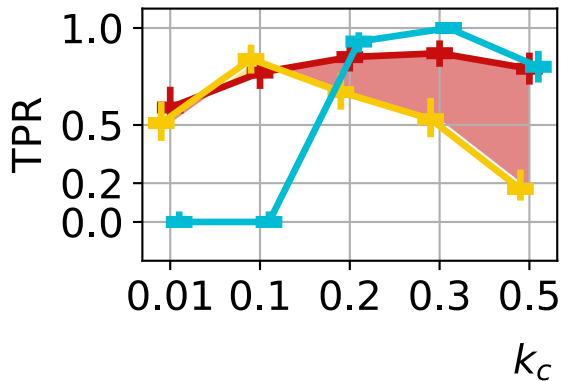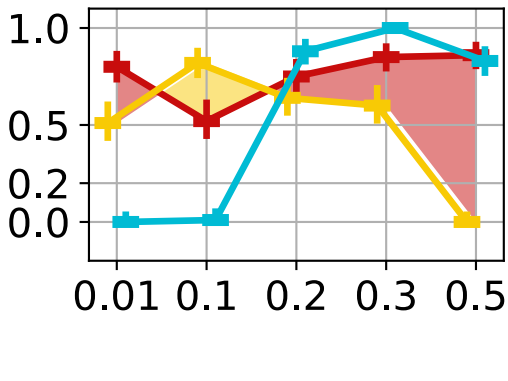

Supplement: supplementary_material [file attachment]

Confounder,  $w = 0.5$ , standardized,  $dim_c = 1$

$dim_d = 1, n_c = 3$

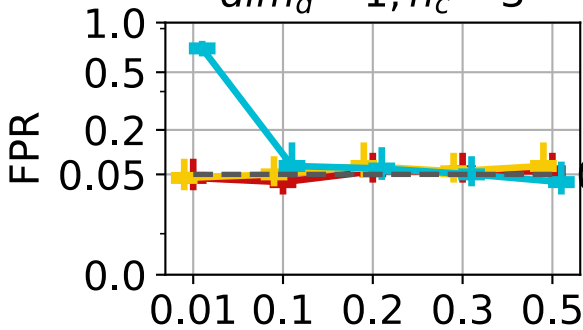

$dim_d = 1, n_c = 4$

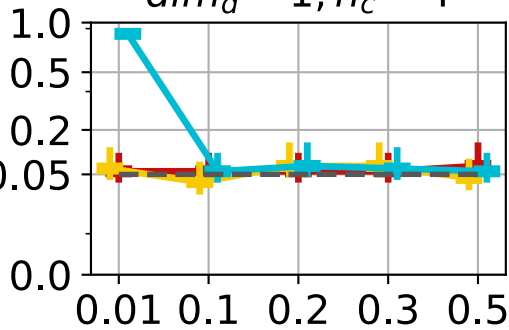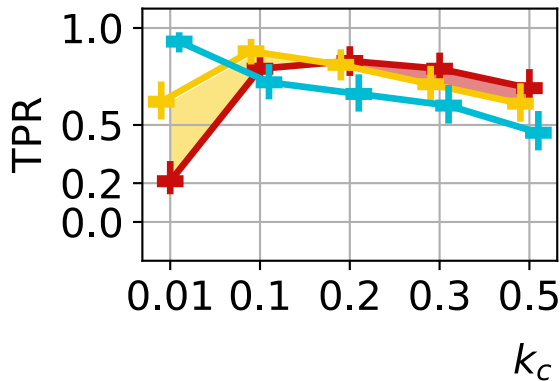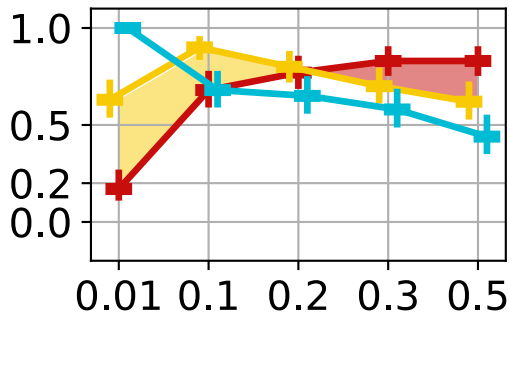

Supplement: supplementary_material [file attachment]

# ZMADG

Confounder,  $n=1000$ ,  $\dim_d=1$ ,  $\dim_c=1$ ,  $n_c=3$ , standardize

$H_0$

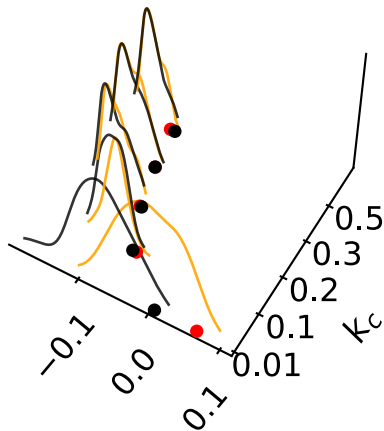

$H_1$

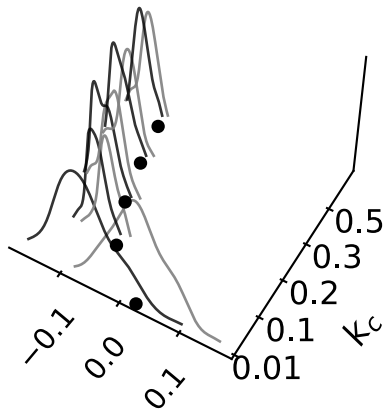

Supplement: supplementary_material [file attachment]

$MS_{0-\infty}$   
 Confounder,  $n=1000$ ,  $\dim_d=2$ ,  $\dim_c=1$ ,  $n_c=3$ , scale

$H_0$

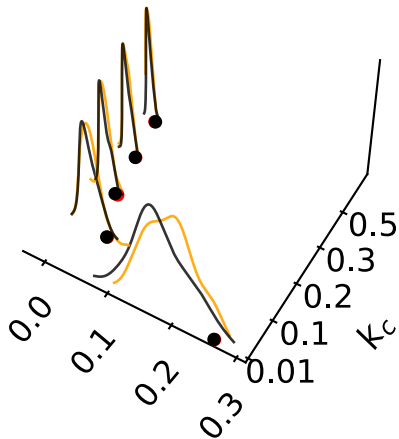

$H_1$

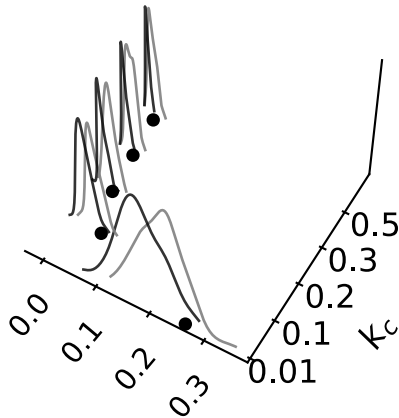

Supplement: supplementary_material [file attachment]

Independent  $Z$ ,  $w = 0.5$ , scaled (0, 1)

$dim_d = 2, n_c = 3$

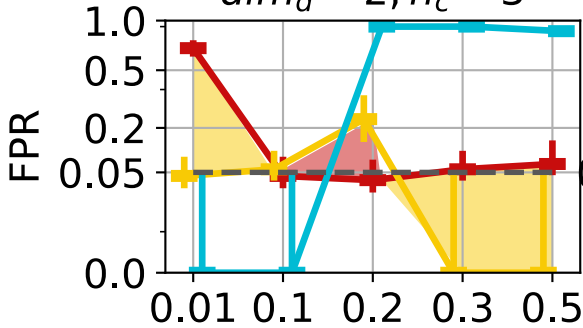

$dim_d = 2, n_c = 4$

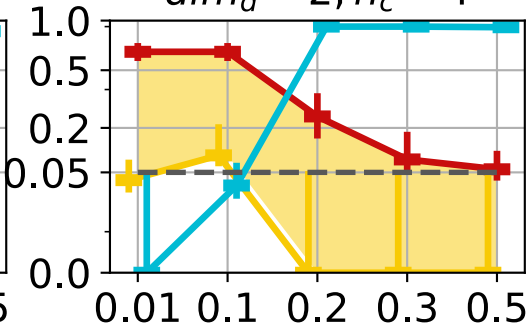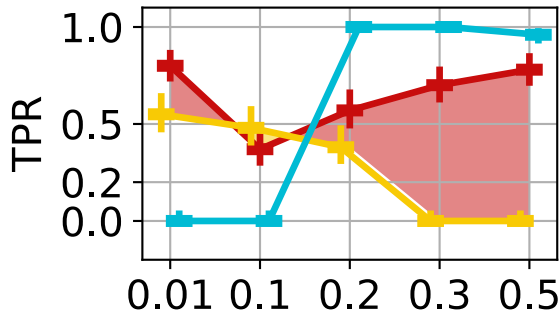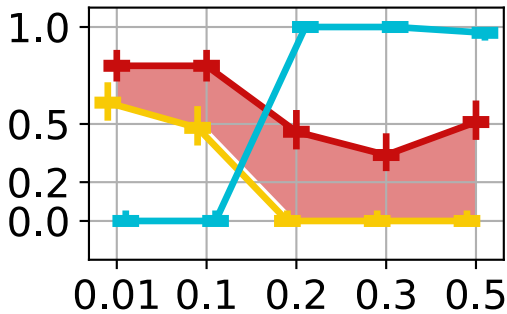

$k_c$

Supplement: supplementary_material [file attachment]

$MS_{0-\infty}$   
 Confounder,  $n=1000$ ,  $\dim_d=1$ ,  $\dim_c=1$ ,  $n_c=4$ , ranks

$H_0$

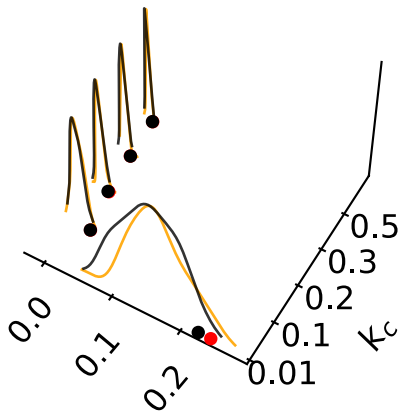

$H_1$

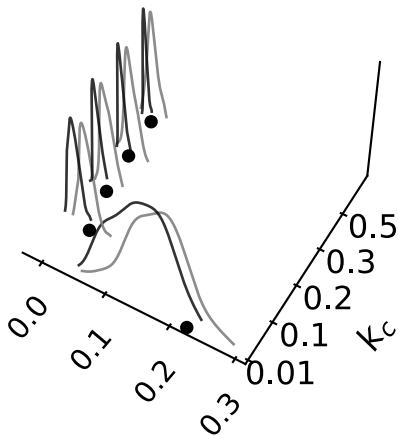

Supplement: supplementary_material [file attachment]

$MS_{0-\infty}$   
Confounder,  $n=1000$ ,  $\dim_d=2$ ,  $\dim_c=1$ ,  $n_c=4$ , scale

$H_0$

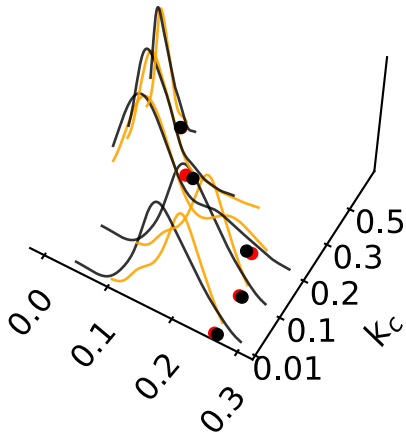

$H_1$

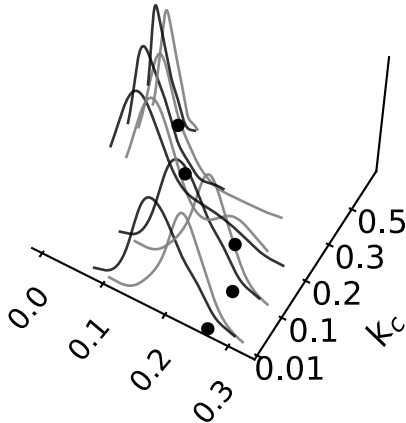

Supplement: supplementary_material [file attachment]

$$MS_{0-\infty}$$

Confounder,  $n=1000$ ,  $\dim_d=2$ ,  $\dim_c=1$ ,  $n_c=4$ , standardize

$H_0$

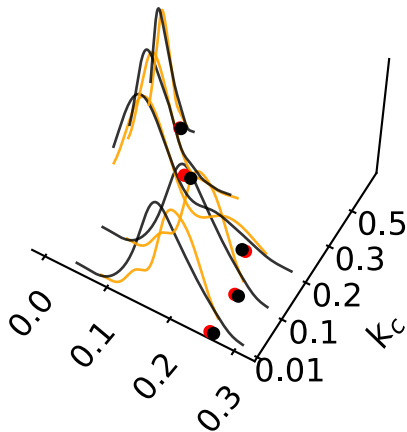

$H_1$

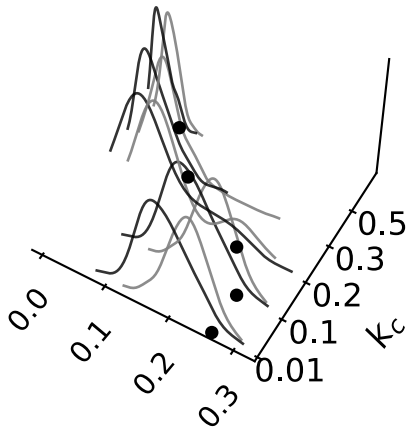

Supplement: supplementary_material [file attachment]

# ZMADG

Confounder,  $n=1000$ ,  $\dim_d=1$ ,  $\dim_c=1$ ,  $n_c=4$ , standardize

$H_0$

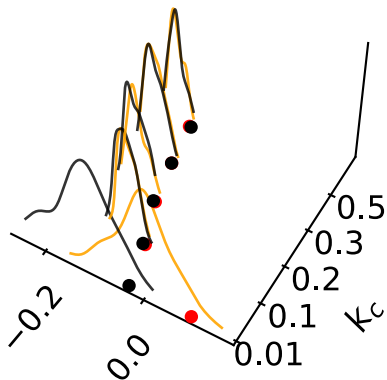

$H_1$

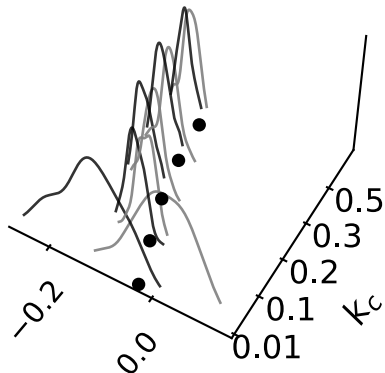

Supplement: supplementary_material [file attachment]

Confounder,  $w = 0.5$ , scaled (0,1),  $\dim_c = 1$

$\dim_d = 2, n_c = 3$

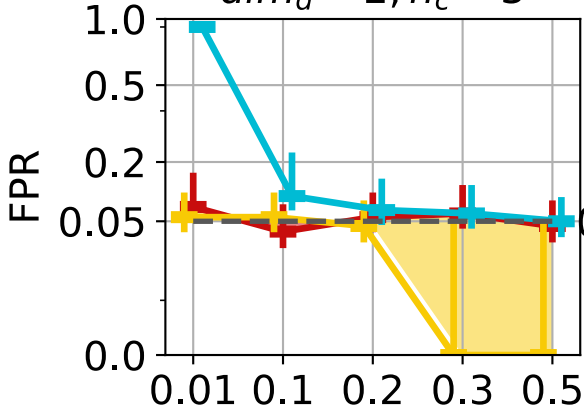

$\dim_d = 2, n_c = 4$

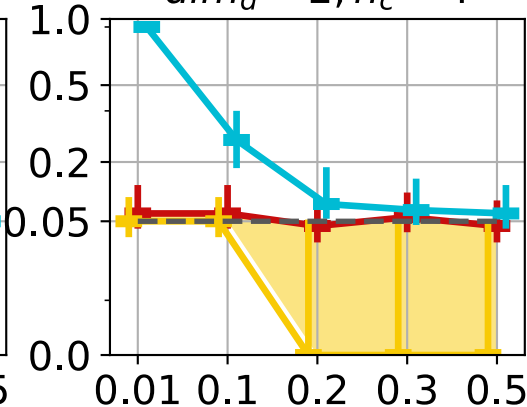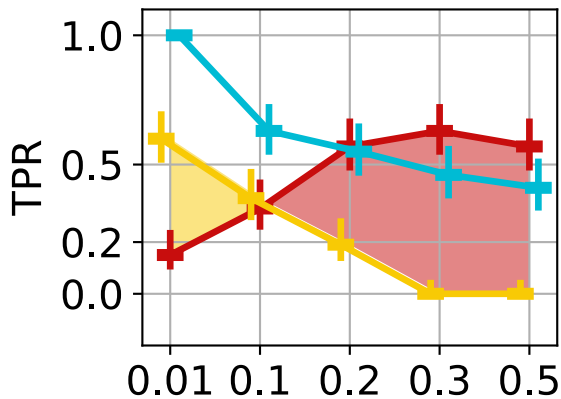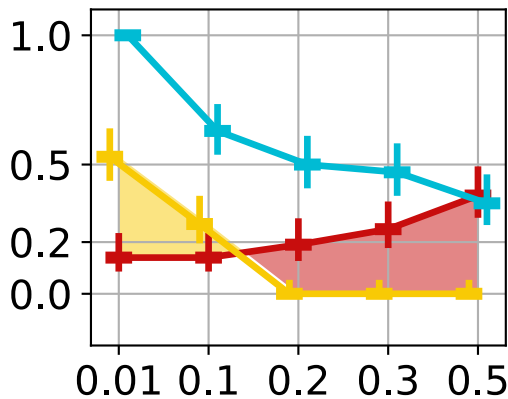

$k_c$

Supplement: supplementary_material [file attachment]

Chain,  $w = 0.5$ , scaled (0, 1)

$\text{dim}_d = 1, n_c = 3$

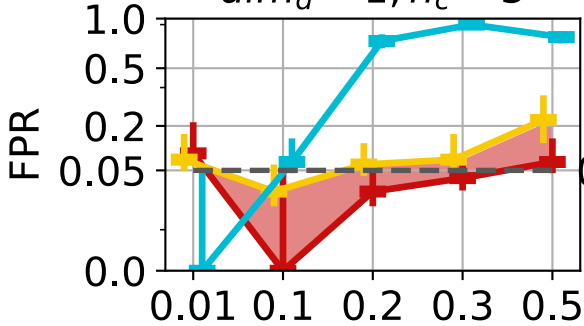

$\text{dim}_d = 1, n_c = 4$

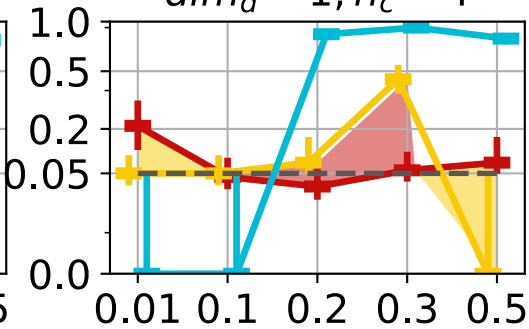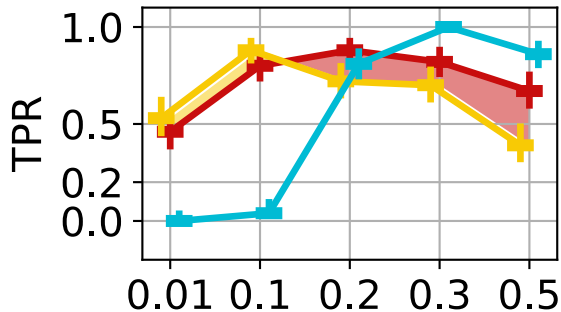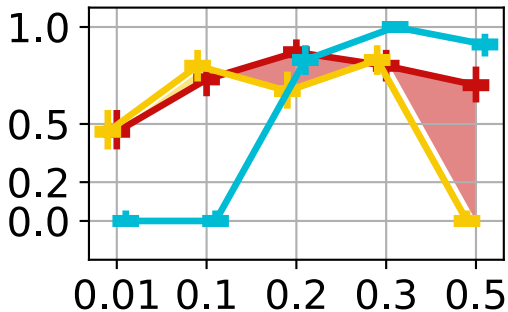

$k_c$

Supplement: supplementary_material [file attachment]

# ZMADG

Confounder,  $n=1000$ ,  $\dim_d=2$ ,  $\dim_c=1$ ,  $n_c=4$ , standardize

$H_0$

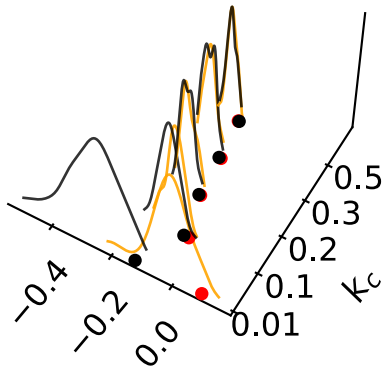

$H_1$

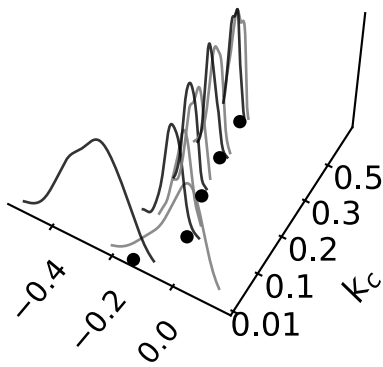

Supplement: supplementary_material [file attachment]

$$MS_{0-\infty}$$

Confounder,  $n=1000$ ,  $\dim_d=2$ ,  $\dim_c=1$ ,  $n_c=3$ , standardize

$H_0$

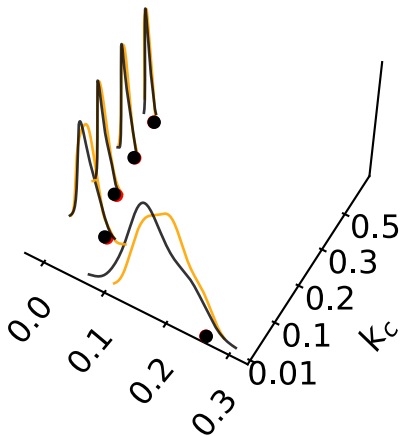

$H_1$

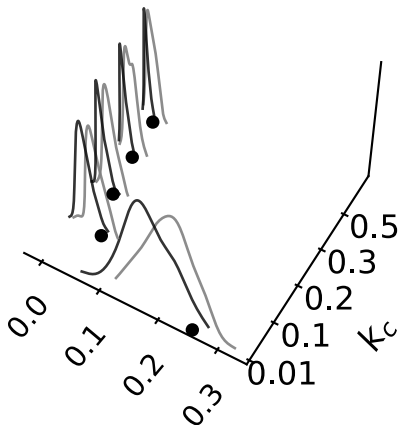

Supplement: supplementary_material [file attachment]

# ZMADG

Confounder,  $n=1000$ ,  $\dim_d=1$ ,  $\dim_c=1$ ,  $n_c=4$ , scale

$H_0$

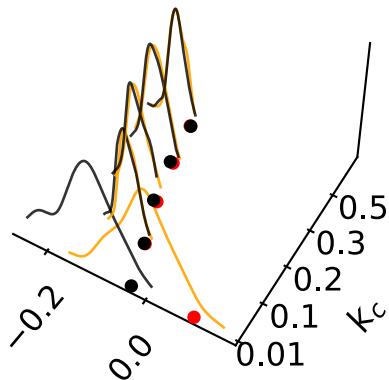

$H_1$

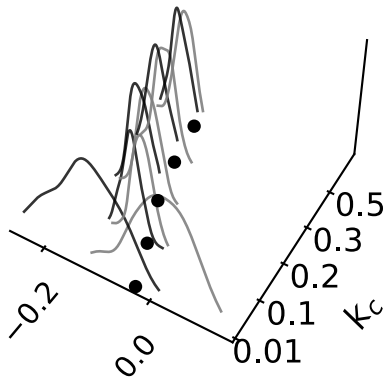

Supplement: supplementary_material [file attachment]

Confounder,  $w = 0.5$ , rank,  $dim_c = 1$

$dim_d = 1, n_c = 3$

$dim_d = 1, n_c = 4$

$MS_{0-\infty}$  (ours)  
 $MS$   
 $ZMADG$

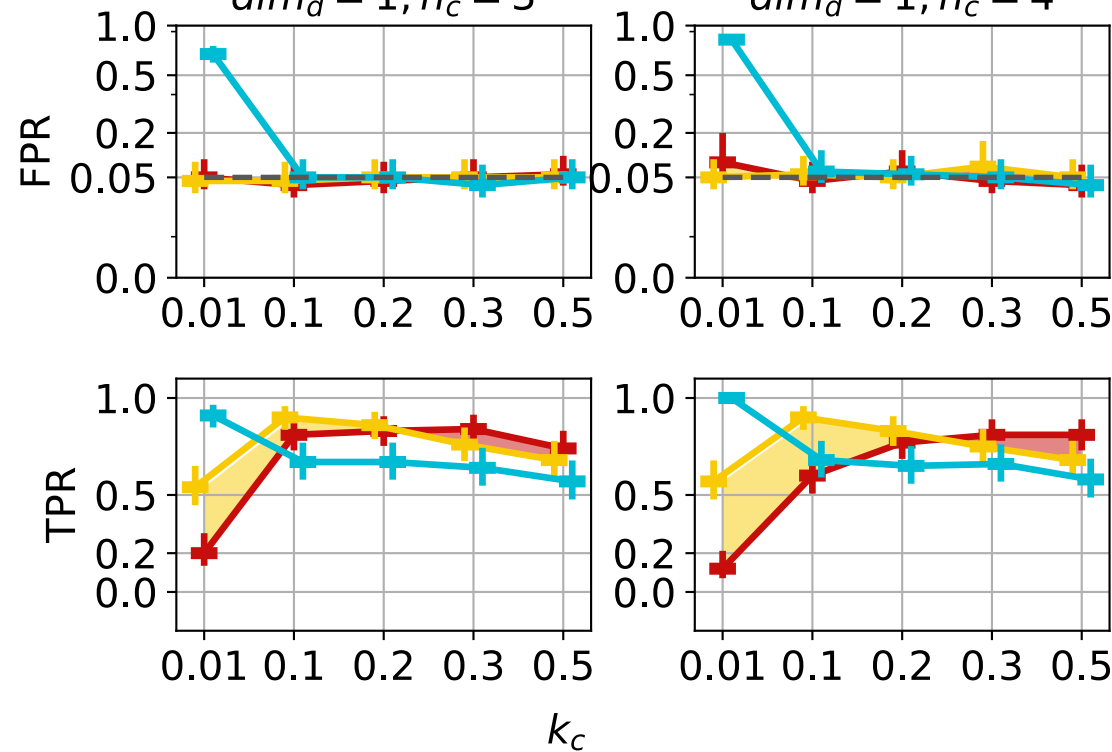

Supplement: supplementary_material [file attachment]

Confounder,  $w = 0.5$ , standardized,  $\dim_c = 1$

$\dim_d = 2, n_c = 3$

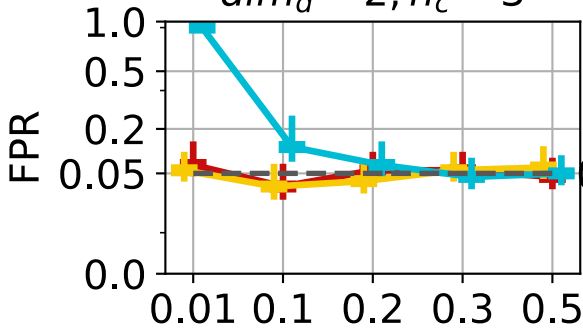

$\dim_d = 2, n_c = 4$

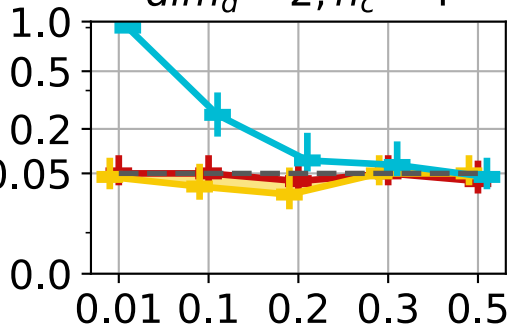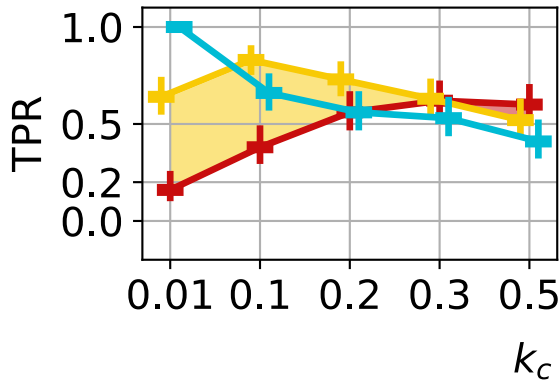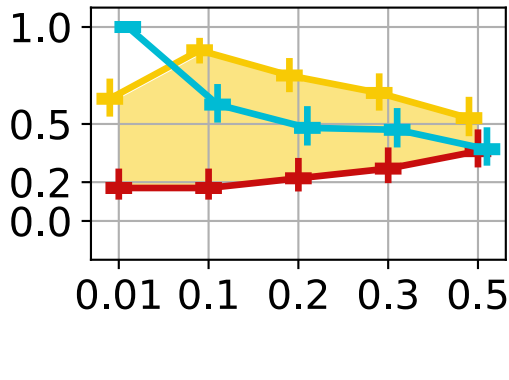

Supplement: supplementary_material [file attachment]

Independent  $Z$ ,  $w = 0.5$ , rank

$dim_d = 2, n_c = 3$

$dim_d = 2, n_c = 4$

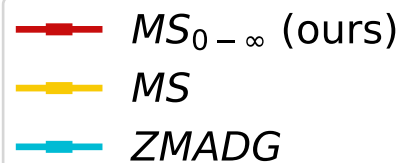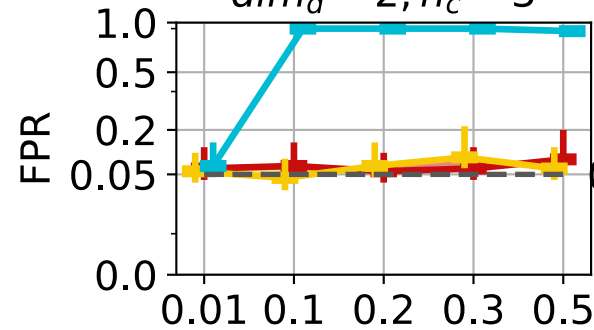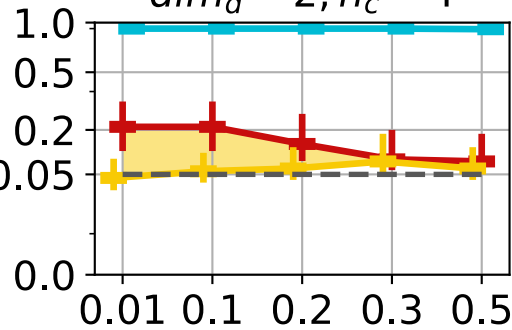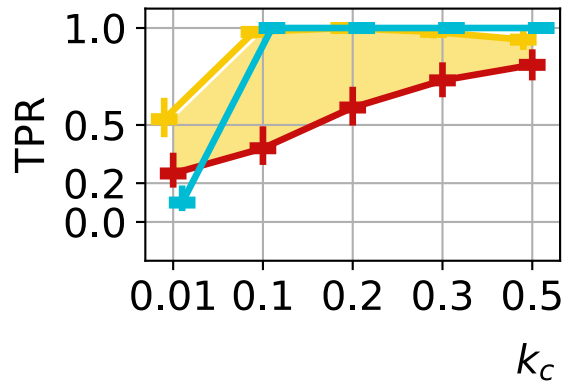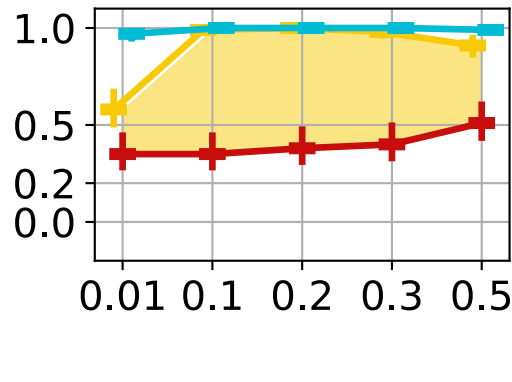

Supplement: supplementary_material [file attachment]

$$MS_{0-\infty}$$

Confounder,  $n=1000$ ,  $\dim_d=1$ ,  $\dim_c=1$ ,  $n_c=4$ , standardize

$H_0$

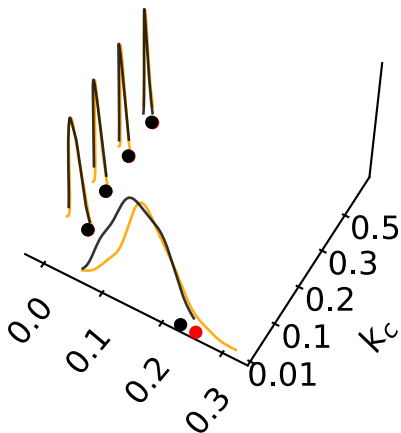

$H_1$

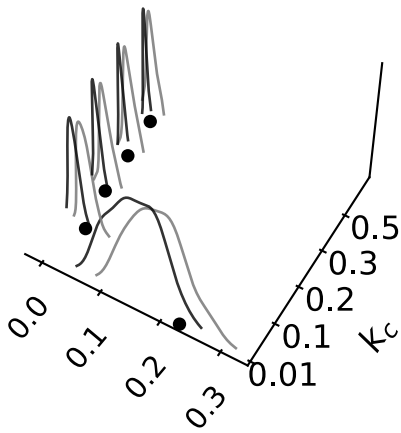

Supplement: supplementary_material [file attachment]

Confounder,  $w = 0.5$ , rank,  $\dim_c = 1$

$\dim_d = 2, n_c = 3$

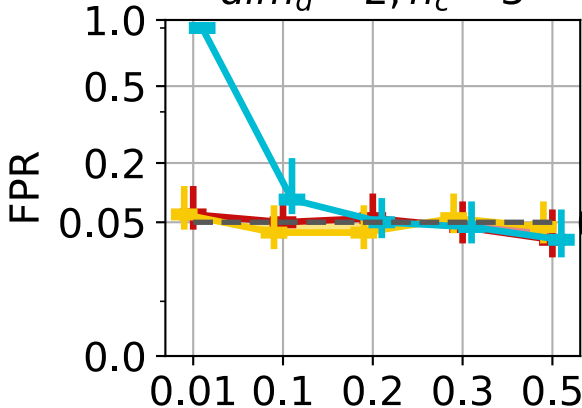

$\dim_d = 2, n_c = 4$

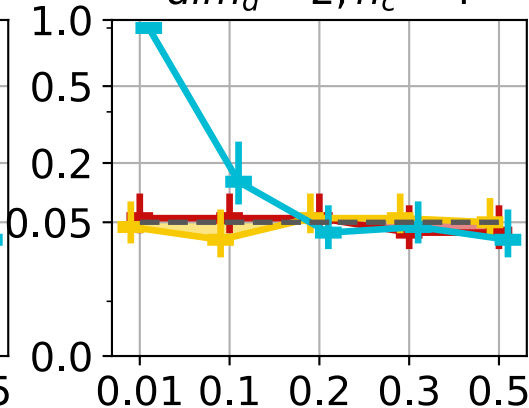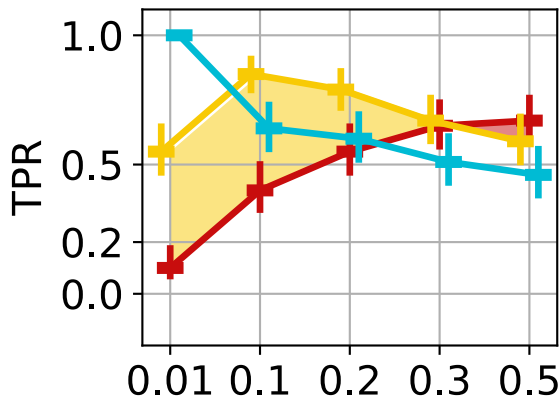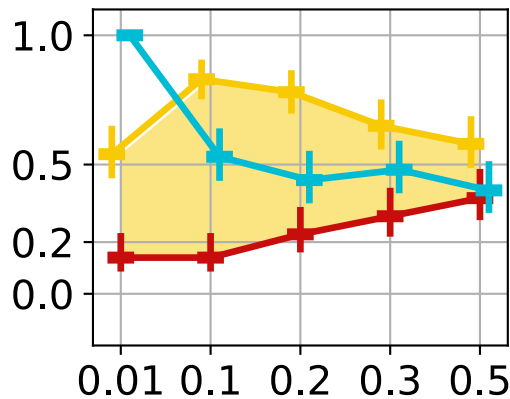

$k_c$

Supplement: supplementary_material [file attachment]

Confounder,  $w = 0.5$ , standardized,  $dim_c = 1$

$dim_d = 1, n_c = 3$



$dim_d = 1, n_c = 4$



Supplement: supplementary_material [file attachment]

Cluster-dep. confounder,  $w = 0.75$ , rank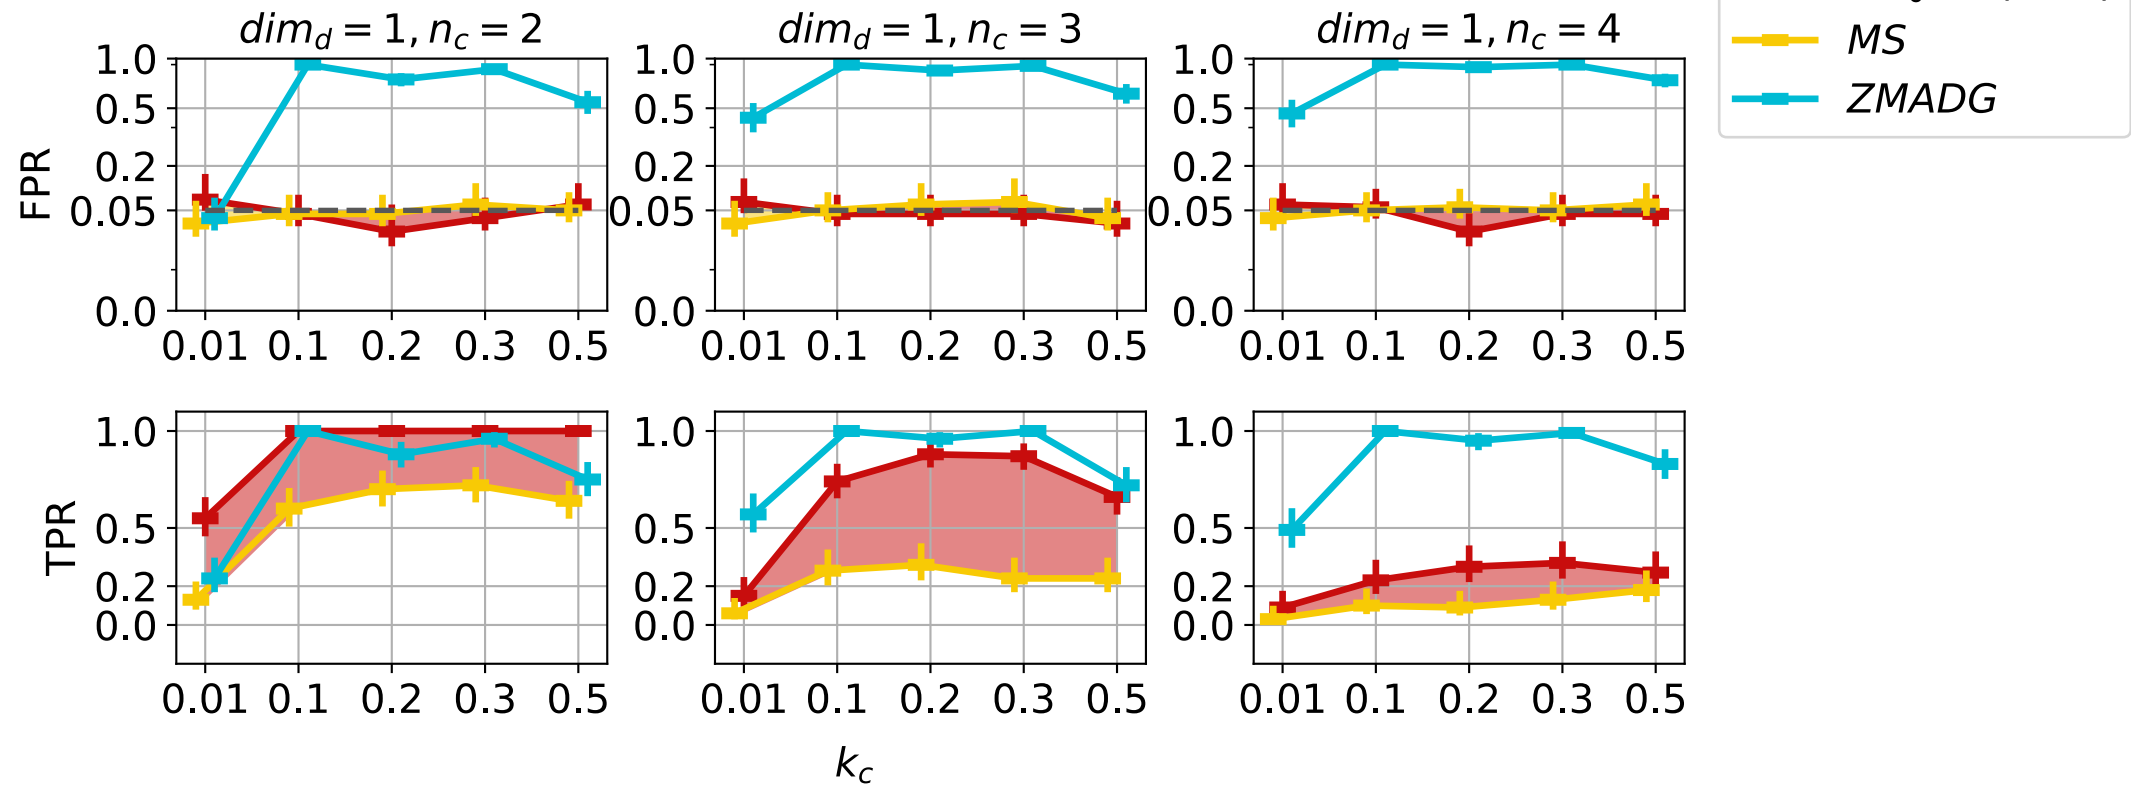

Supplement: supplementary_material [file attachment]

*MS*

Confounder,  $n=1000$ ,  $\dim_d=1$ ,  $\dim_c=1$ ,  $n_c=3$ , ranks

$H_0$

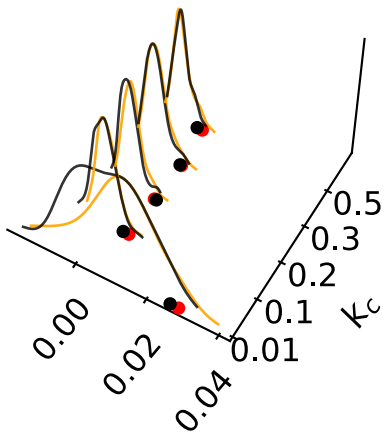

$H_1$

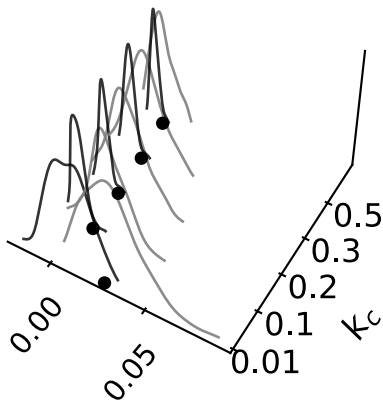

Supplement: supplementary_material [file attachment]

Independent  $Z$ ,  $w = 0.5$ , standardized

$dim_d = 2, n_c = 3$

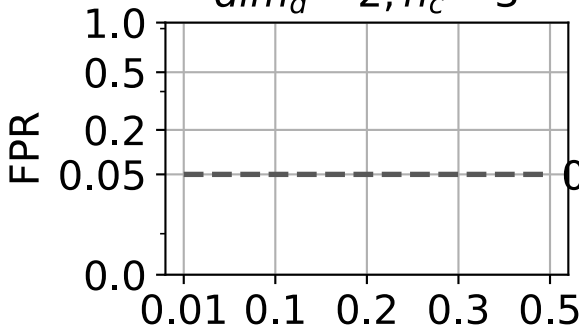

$dim_d = 2, n_c = 4$

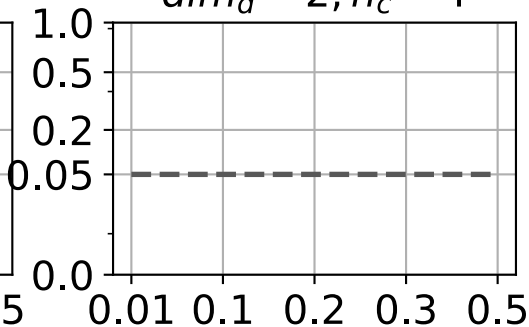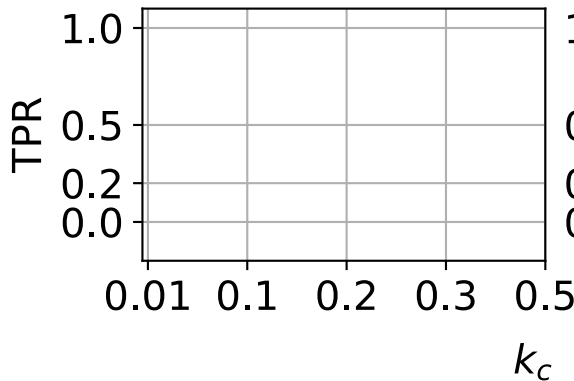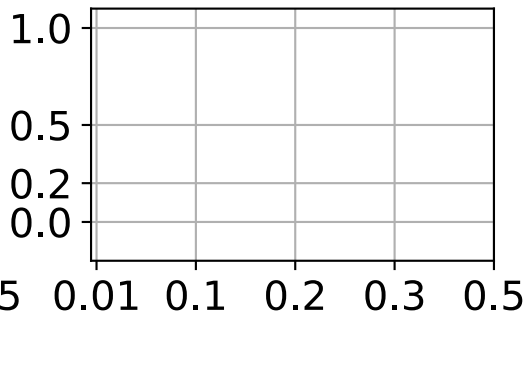

Supplement: supplementary_material [file attachment]

# ZMADG

Confounder,  $n=1000$ ,  $\dim_d=2$ ,  $\dim_c=1$ ,  $n_c=3$ , ranks

$H_0$

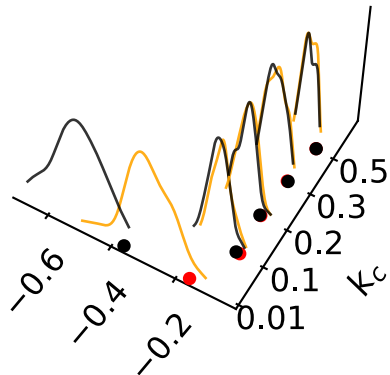

$H_1$

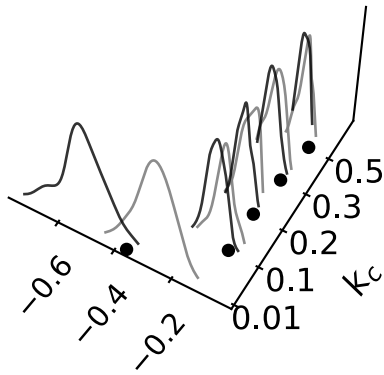

Supplement: supplementary_material [file attachment]

# ZMADG

Confounder,  $n=1000$ ,  $\dim_d=2$ ,  $\dim_c=1$ ,  $n_c=3$ , standardize

$H_0$

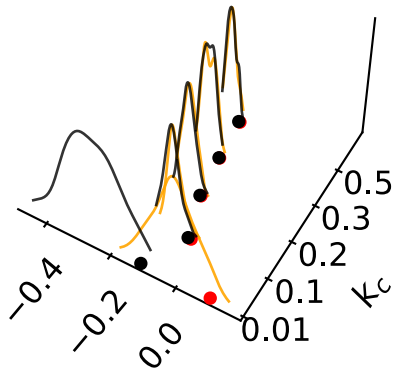

$H_1$

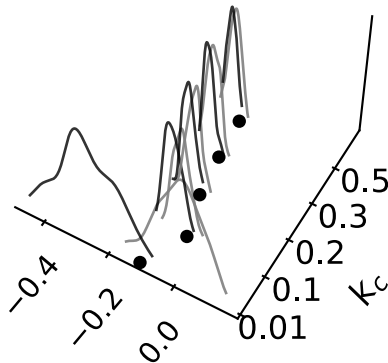

Supplement: supplementary_material [file attachment]

Confounder,  $w = 0.5$ , scaled (0,1),  $\dim_c = 1$

$\dim_d = 1, n_c = 3$

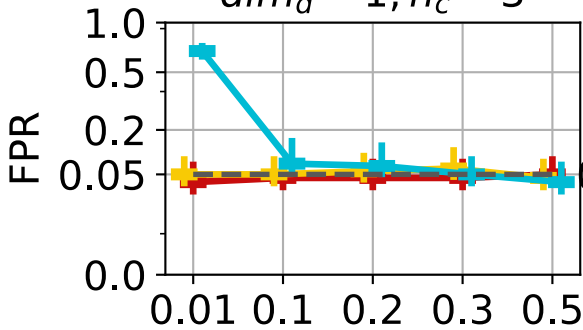

$\dim_d = 1, n_c = 4$

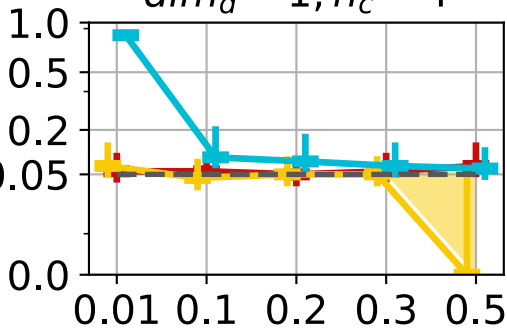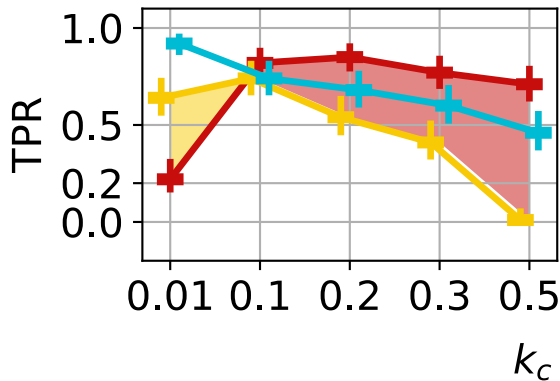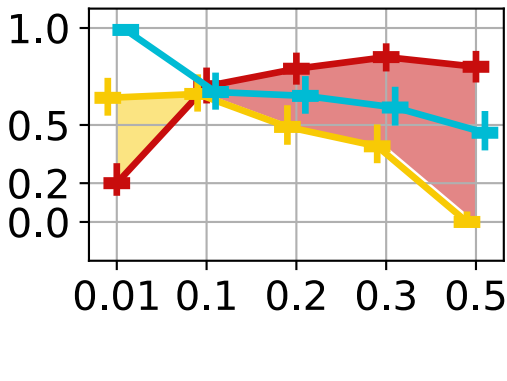

Supplement: supplementary_material [file attachment]

*MS*

Confounder,  $n=1000$ ,  $\dim_d=1$ ,  $\dim_c=1$ ,  $n_c=3$ , scale

$H_0$

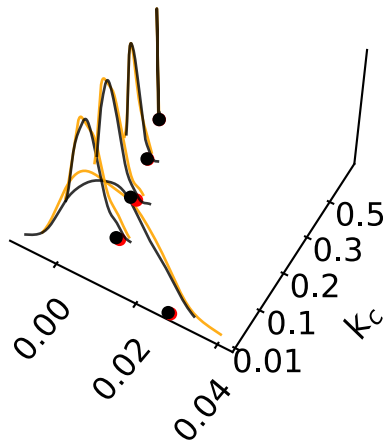

$H_1$

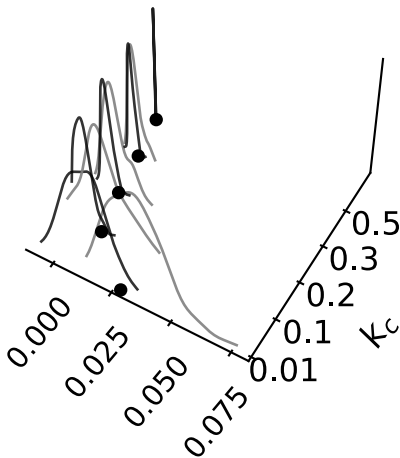

Supplement: supplementary_material [file attachment]

Chain,  $w = 0.5$ , standardized

$dim_d = 1, n_c = 3$

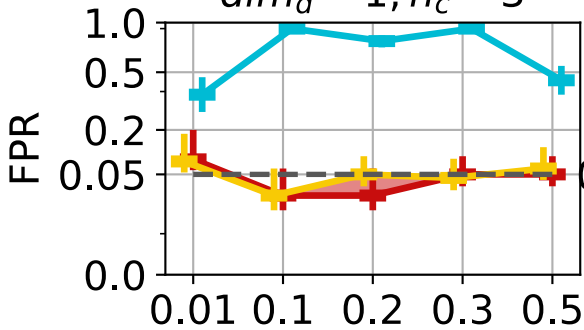

$dim_d = 1, n_c = 4$

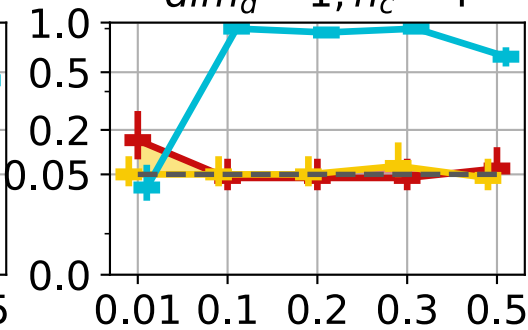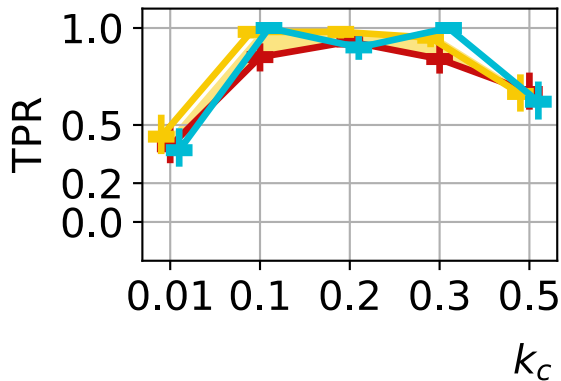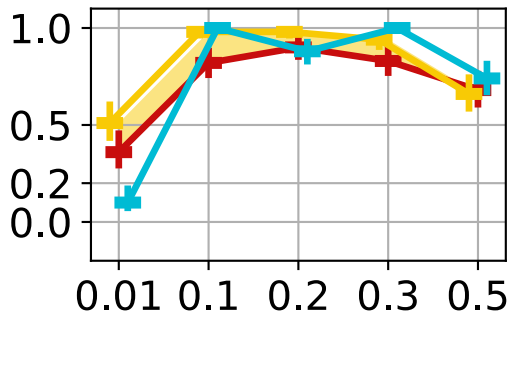

Supplement: supplementary_material [file attachment]

Confounder,  $w = 0.5$ , rank,  $\dim_c = 1$

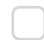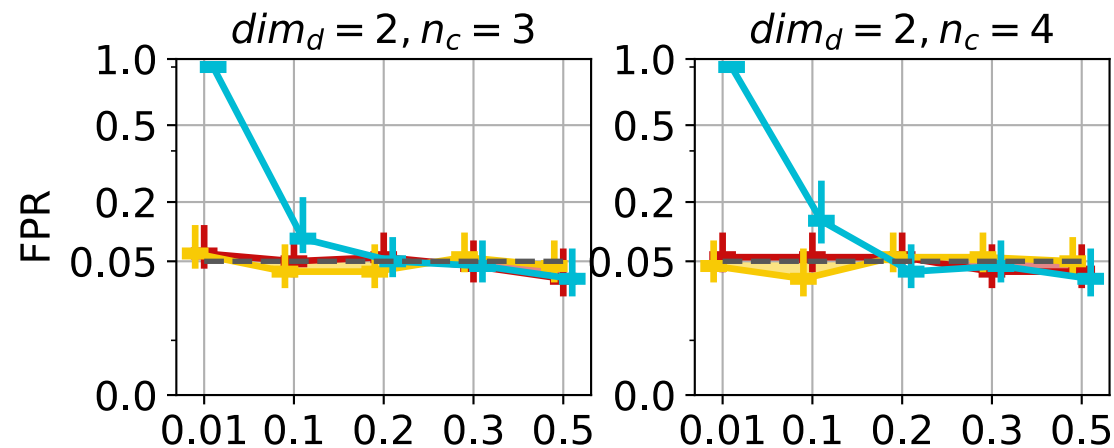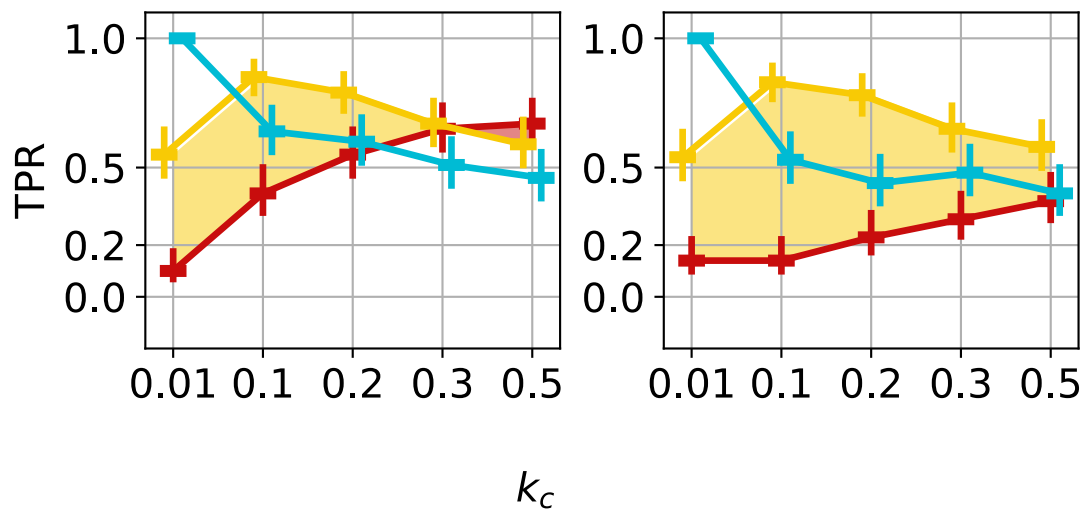

Supplement: supplementary_material [file attachment]

*MS*

Confounder,  $n=1000$ ,  $\dim_d=2$ ,  $\dim_c=1$ ,  $n_c=3$ , ranks

$H_0$

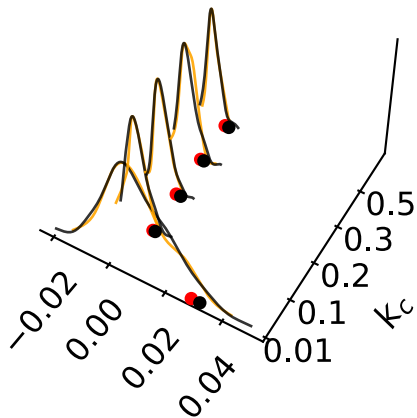

$H_1$

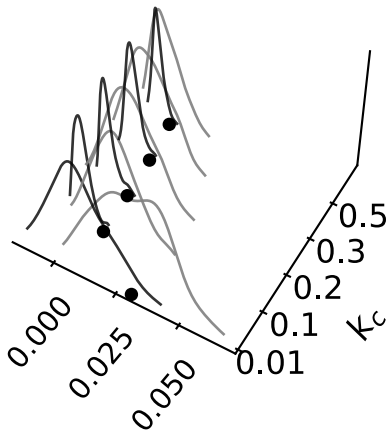

Supplement: supplementary_material [file attachment]

Confounder,  $w = 0.5$ , rank,  $\dim_c = 1$

$\dim_d = 2, n_c = 3$

$\dim_d = 2, n_c = 4$

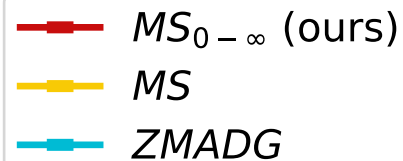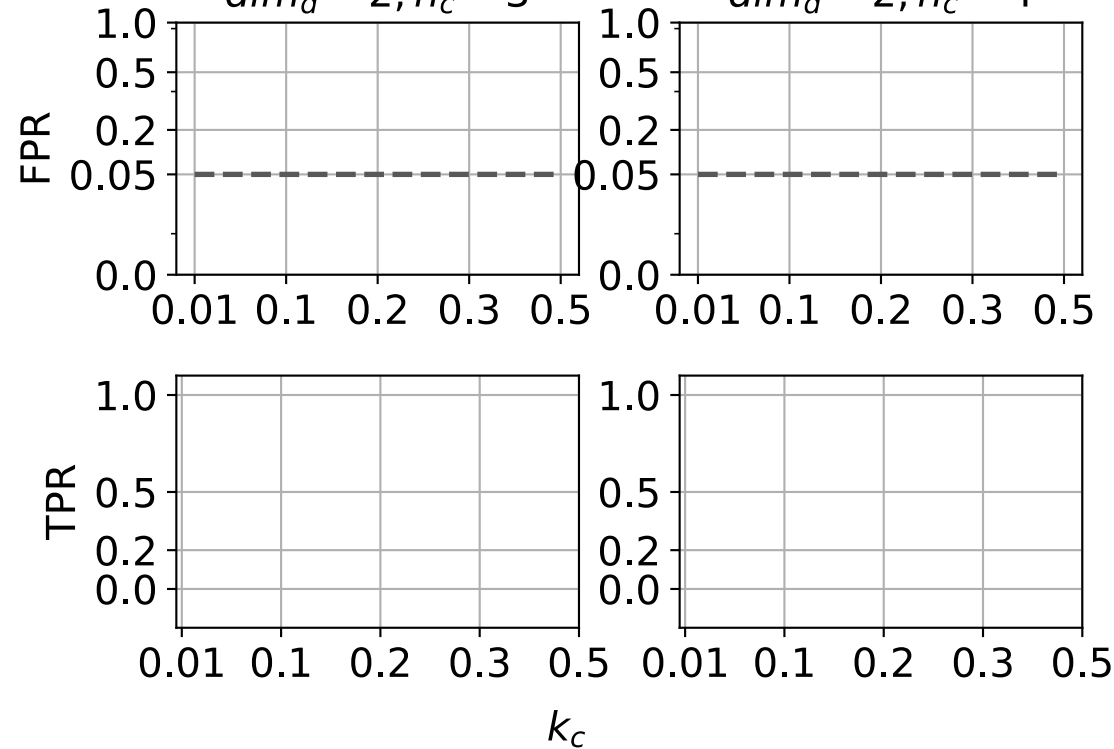

Supplement: supplementary_material [file attachment]

# ZMADG

Confounder,  $n=1000$ ,  $\dim_d=2$ ,  $\dim_c=1$ ,  $n_c=3$ , scale

$H_0$

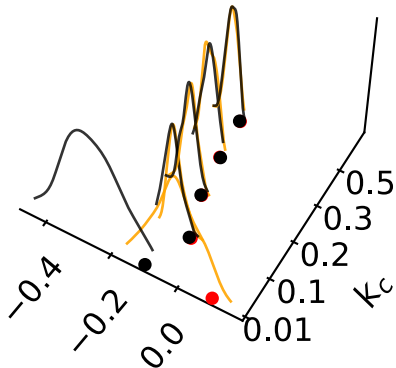

$H_1$

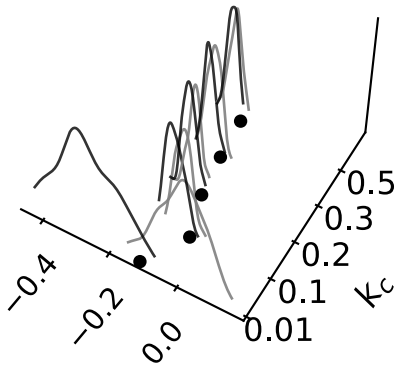

Supplement: supplementary_material [file attachment]

$MS_{0-\infty}$   
 Confounder,  $n=1000$ ,  $dim_d=1$ ,  $dim_c=1$ ,  $n_c=3$ , standardize

$H_0$

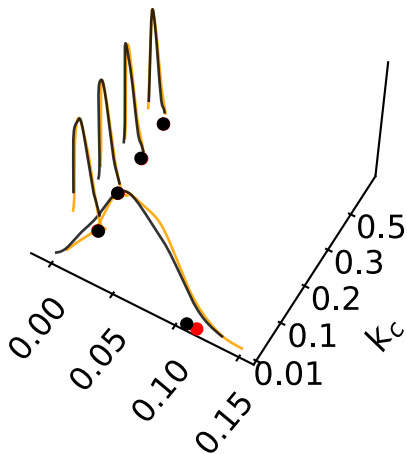

$H_1$

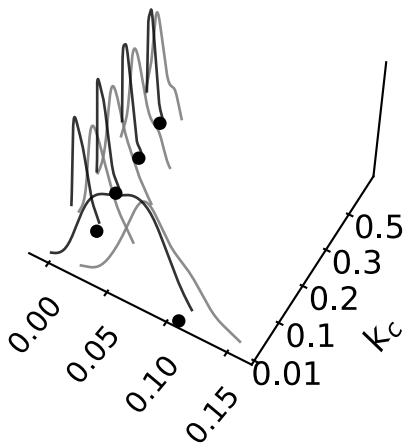

Supplement: supplementary_material [file attachment]

*MS*

Confounder,  $n=1000$ ,  $\dim_d=1$ ,  $\dim_c=1$ ,  $n_c=3$ , standardize

$H_0$

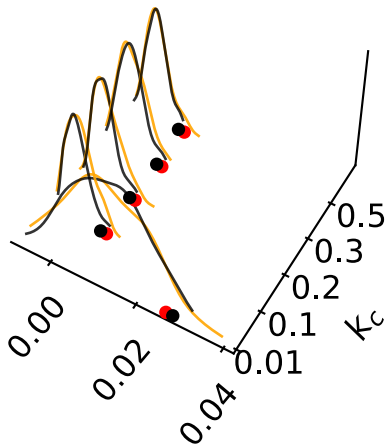

$H_1$

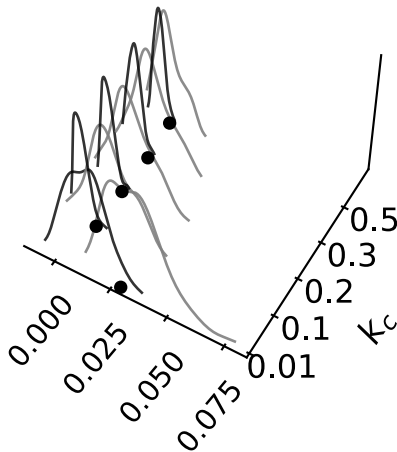

Supplement: supplementary_material [file attachment]

*MS*

Confounder,  $n=1000$ ,  $\dim_d=1$ ,  $\dim_c=1$ ,  $n_c=4$ , ranks

$H_0$

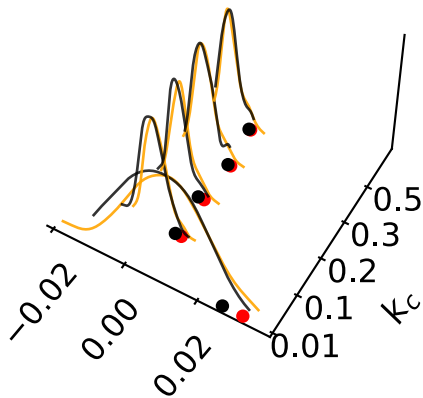

$H_1$

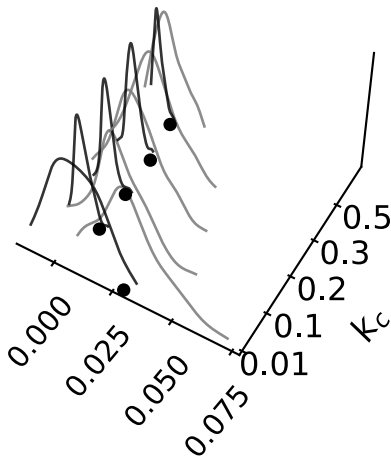

Supplement: supplementary_material [file attachment]

$MS_{0-\infty}$   
 Confounder,  $n=1000$ ,  $\dim_d=1$ ,  $\dim_c=1$ ,  $n_c=3$ , scale

$H_0$

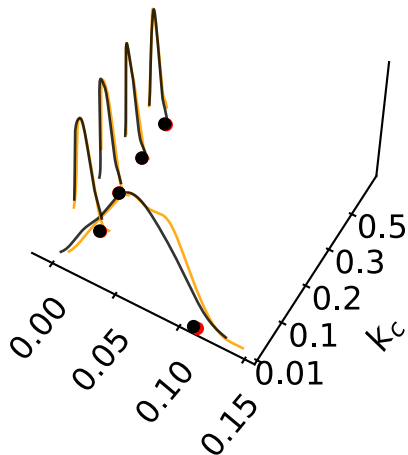

$H_1$

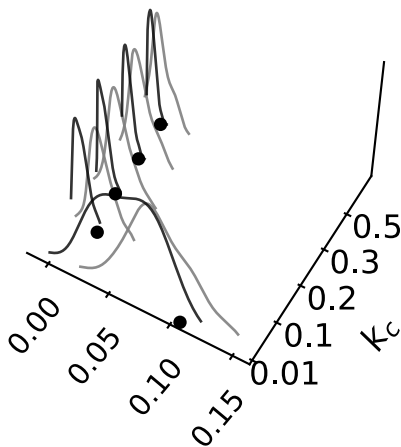

Supplement: supplementary_material [file attachment]

Cluster-dep. confounder,  $w = 0.75$ , standardized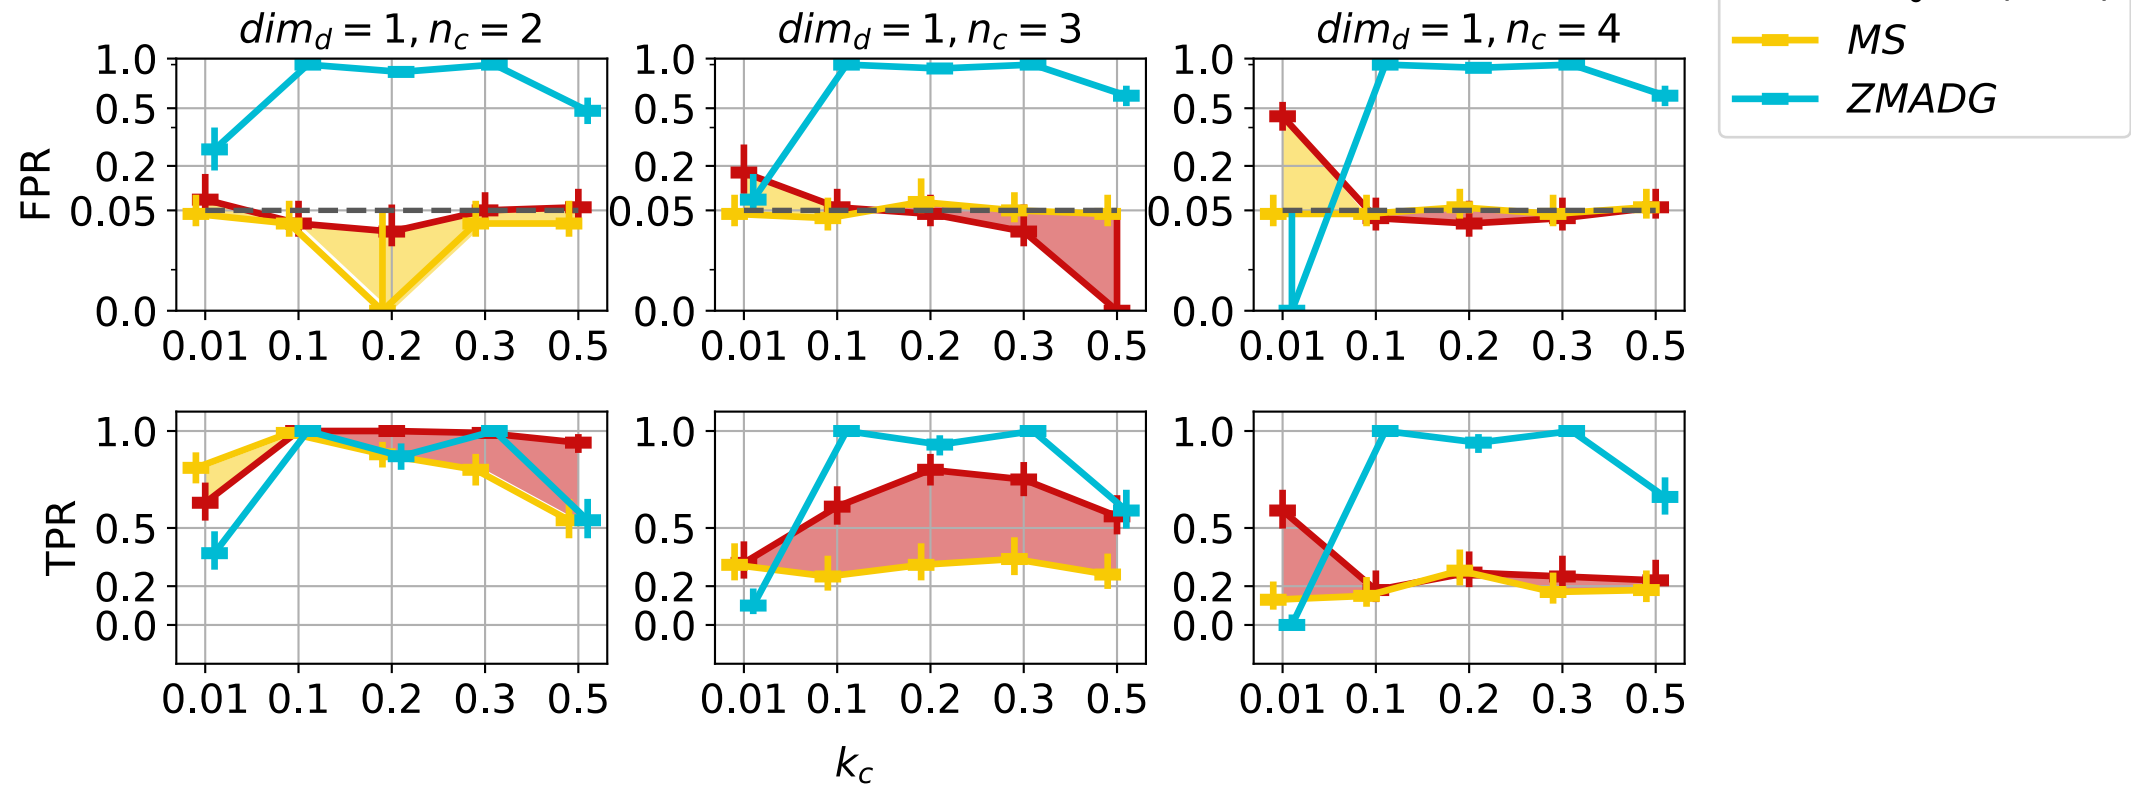

Supplement: supplementary_material [file attachment]

Confounder,  $w = 0.5$ , scaled (0,1),  $\dim_c = 1$

$\dim_d = 1, n_c = 3$

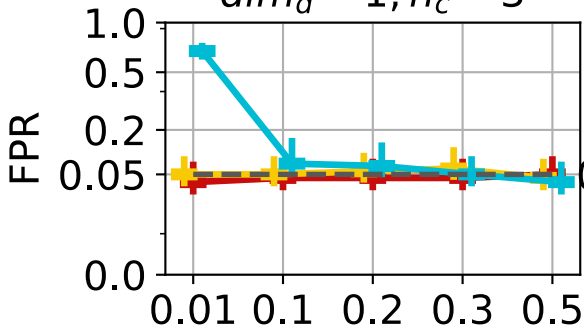

$\dim_d = 1, n_c = 4$

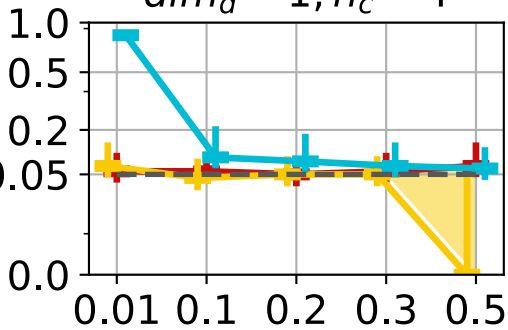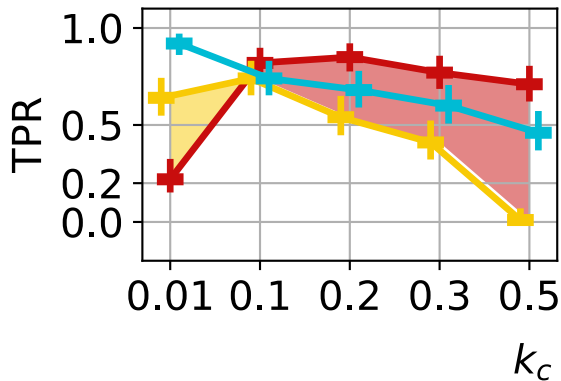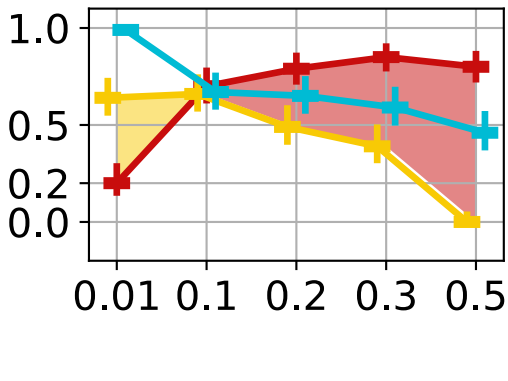

Supplement: supplementary_material [file attachment]

Confounder,  $w = 0.5$ , rank,  $\dim_c = 1$

$\dim_d = 2, n_c = 3$

$\dim_d = 2, n_c = 4$

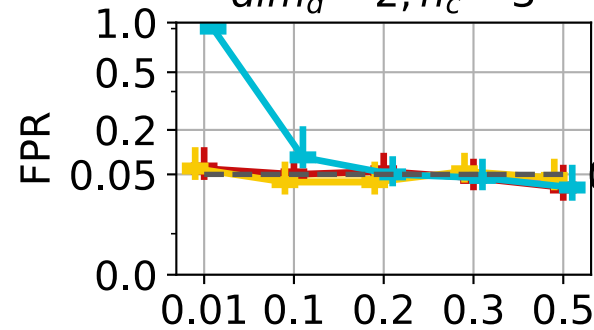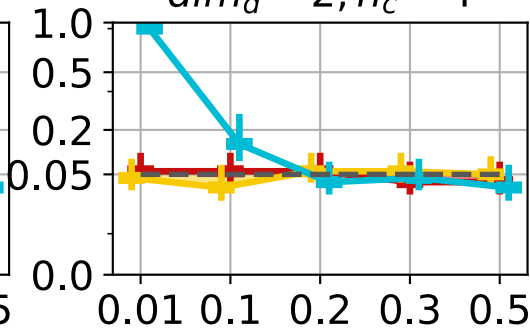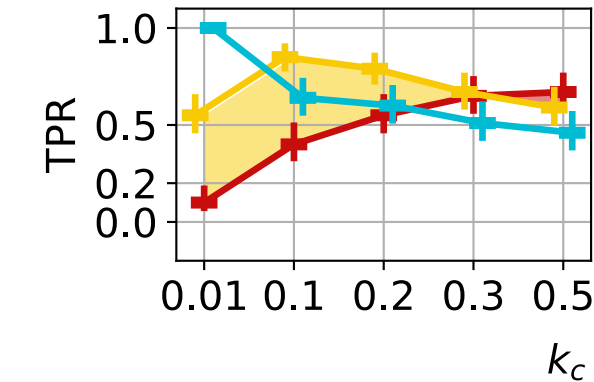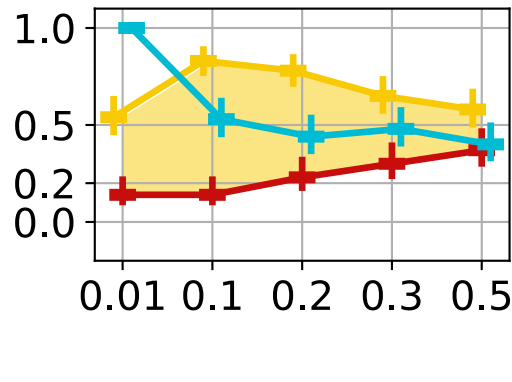

Supplement: supplementary_material [file attachment]

$MS_{0-\infty}$   
 Confounder,  $n=1000$ ,  $\dim_d=2$ ,  $\dim_c=1$ ,  $n_c=3$ , ranks

$H_0$

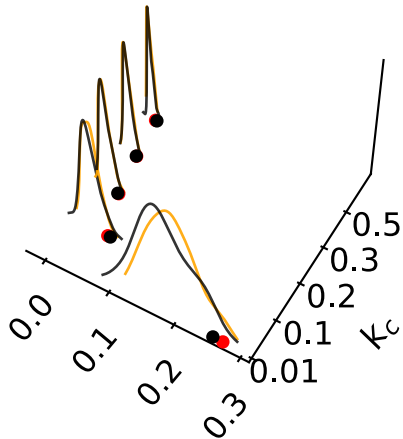

$H_1$

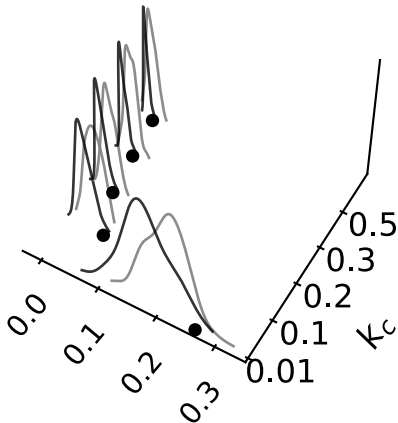

Supplement: supplementary_material [file attachment]

$MS_{0-\infty}$   
 Confounder,  $n=1000$ ,  $\dim_d=1$ ,  $\dim_c=1$ ,  $n_c=4$ , scale

$H_0$

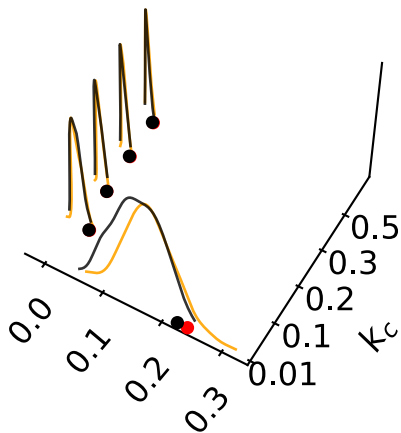

$H_1$

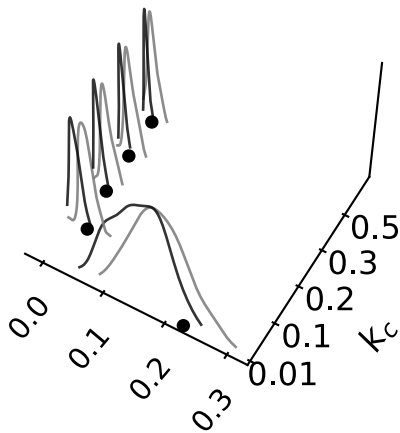

Supplement: supplementary_material [file attachment]

Cluster-dep. confounder,  $w = 0.75$ , scaled (0, 1)

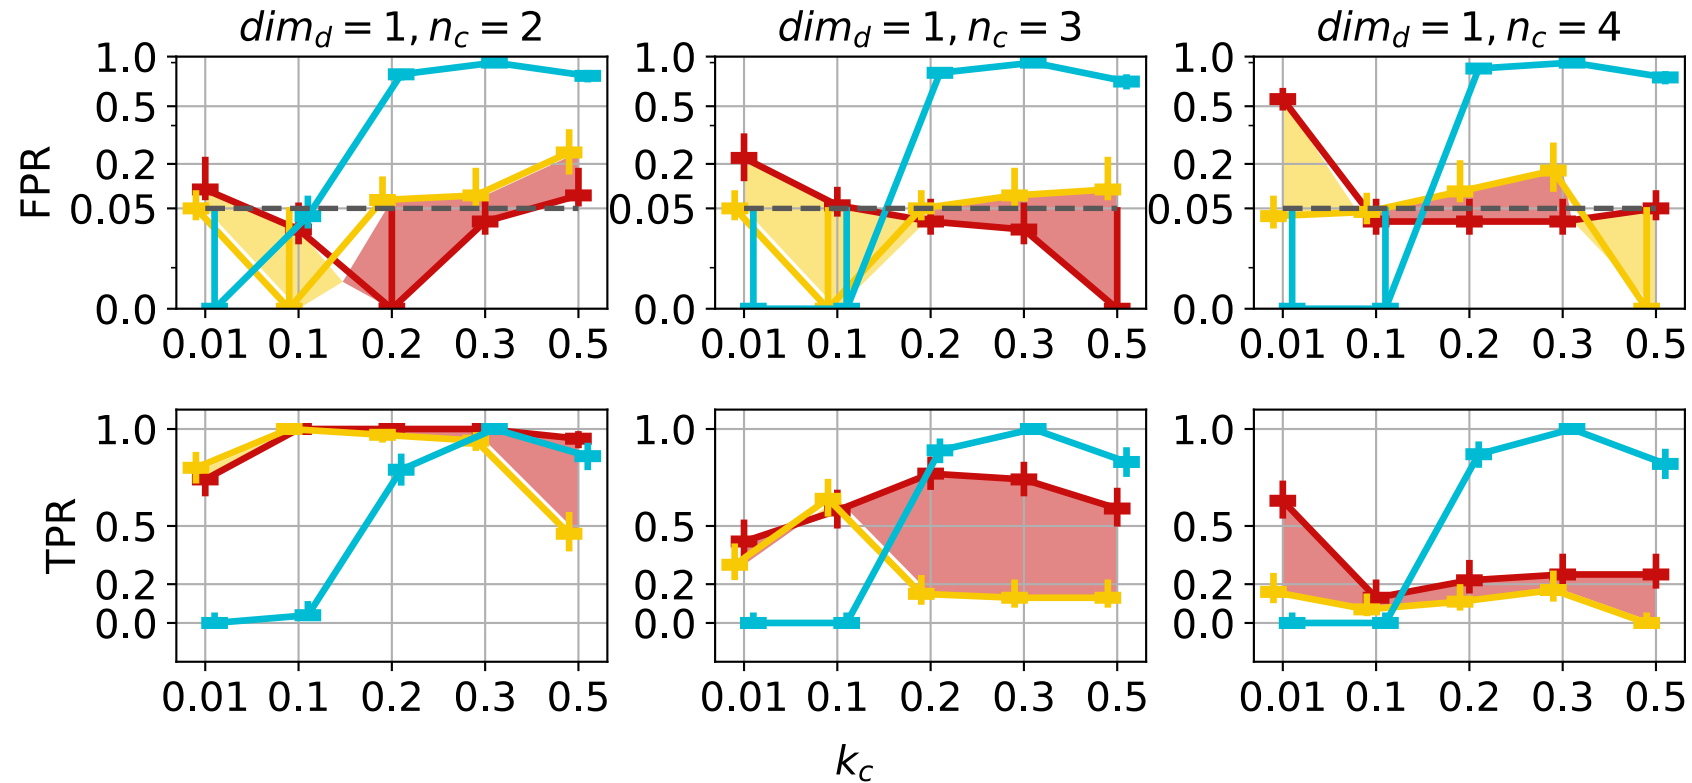

Supplement: supplementary_material [file attachment]

*MS*

Confounder,  $n=1000$ ,  $\dim_d=2$ ,  $\dim_c=1$ ,  $n_c=4$ , scale

$H_0$

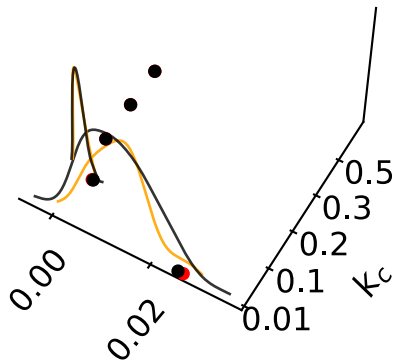

$H_1$

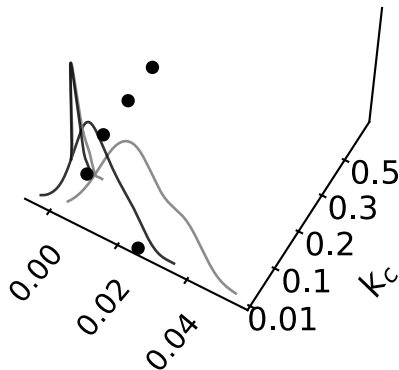

Supplement: supplementary_material [file attachment]

# ZMADG

Confounder,  $n=1000$ ,  $\dim_d=2$ ,  $\dim_c=1$ ,  $n_c=4$ , ranks

$H_0$

$H_1$

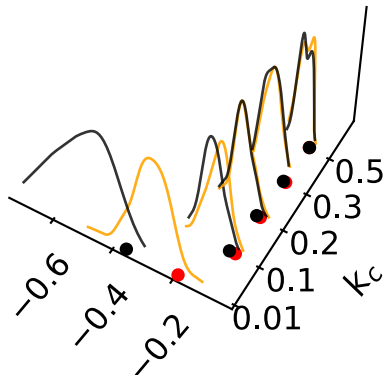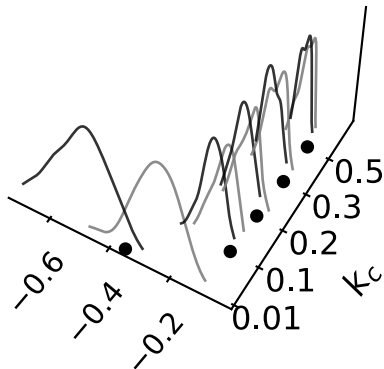

Supplement: supplementary_material [file attachment]

# ZMADG

Confounder,  $n=1000$ ,  $\dim_d=1$ ,  $\dim_c=1$ ,  $n_c=3$ , scale

$H_0$

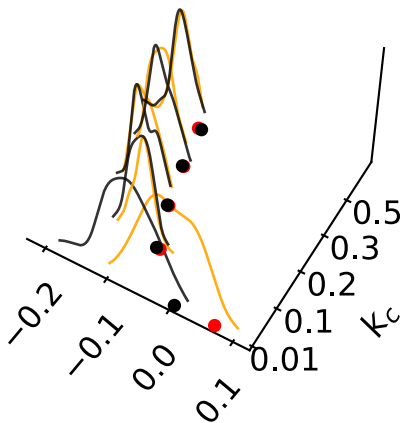

$H_1$

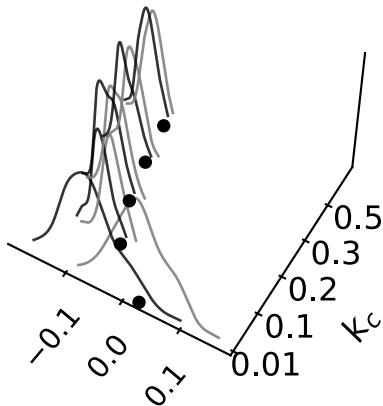

Supplement: supplementary_material [file attachment]

$MS$

Confounder,  $n=1000$ ,  $dim_d=1$ ,  $dim_c=1$ ,  $n_c=4$ , standardize

$H_0$

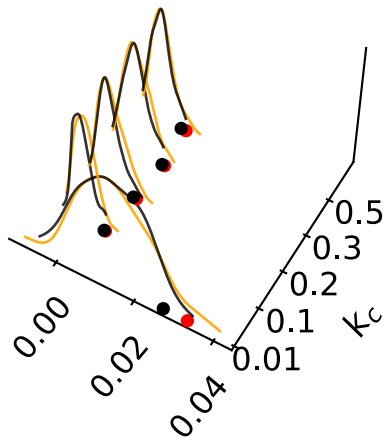

$H_1$

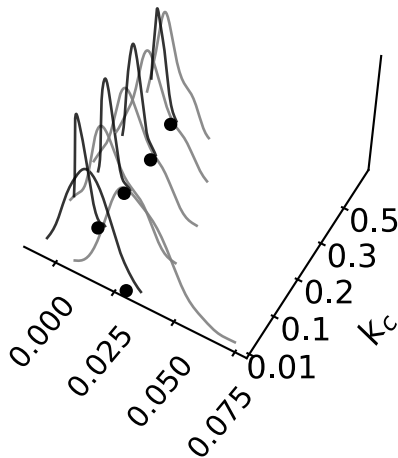

Supplement: supplementary_material [file attachment]

# ZMADG

Confounder,  $n=1000$ ,  $\dim_d=1$ ,  $\dim_c=1$ ,  $n_c=4$ , ranks

$H_0$

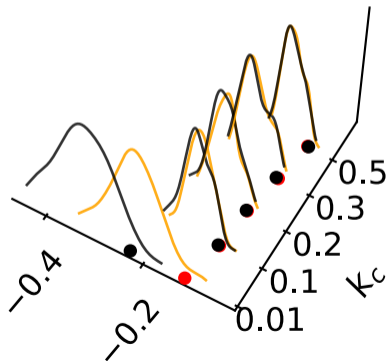

$H_1$

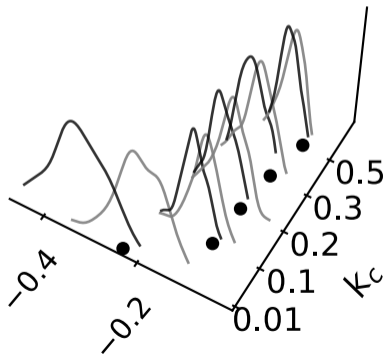

Supplement: supplementary_material [file attachment]

$MS_{0-\infty}$   
 Confounder,  $n=1000$ ,  $\dim_d=2$ ,  $\dim_c=1$ ,  $n_c=4$ , ranks

$H_0$

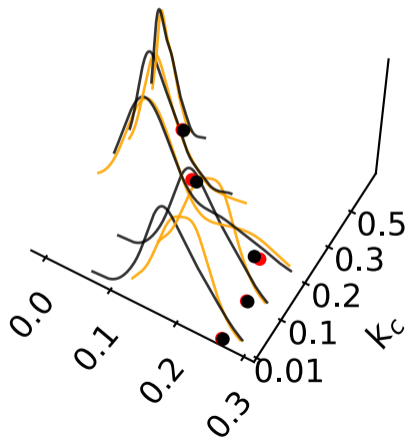

$H_1$

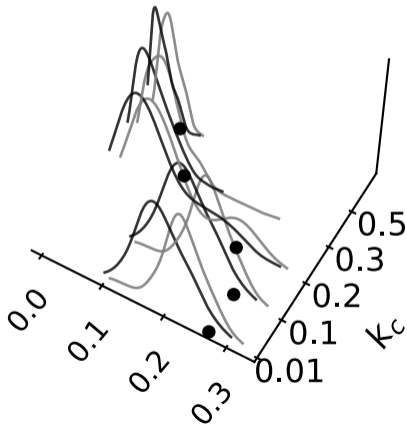

Supplement: supplementary_material [file attachment]

Confounder,  $w = 0.5$ , scaled (0,1),  $\dim_c = 1$

$\dim_d = 2, n_c = 3$

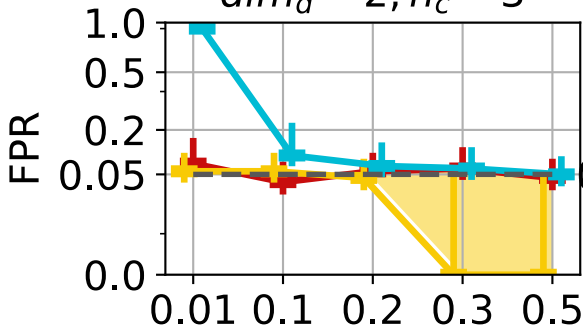

$\dim_d = 2, n_c = 4$

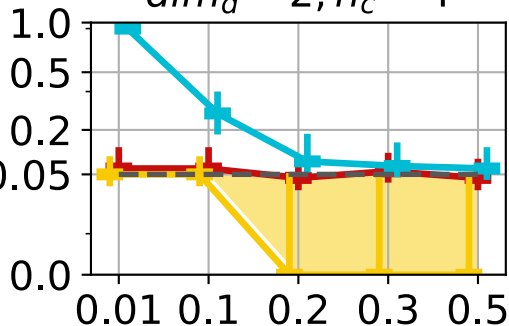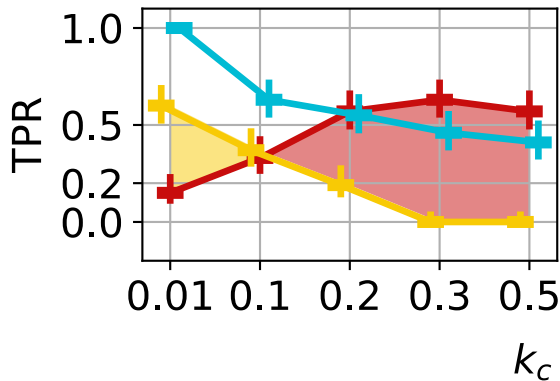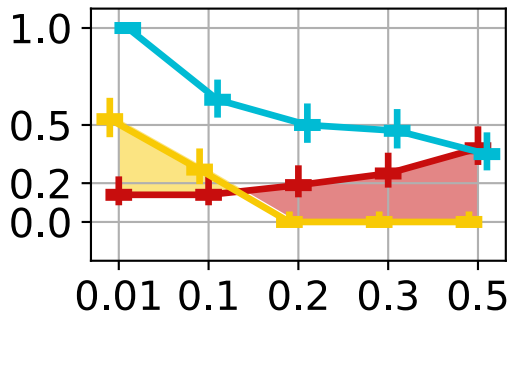

Supplement: supplementary_material [file attachment]

$MS$

Confounder,  $n=1000$ ,  $\dim_d=2$ ,  $\dim_c=1$ ,  $n_c=3$ , scale

$H_0$

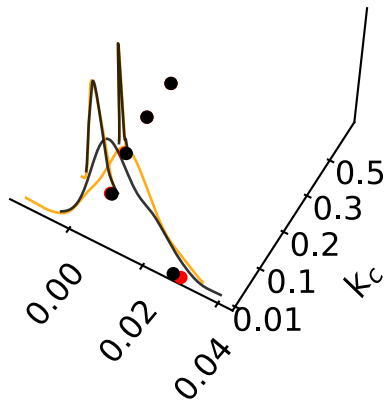

$H_1$

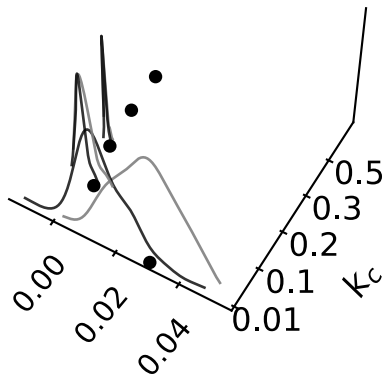

Supplement: supplementary_material [file attachment]

# ZMADG

Confounder,  $n=1000$ ,  $\dim_d=1$ ,  $\dim_c=1$ ,  $n_c=3$ , ranks

$H_0$

$H_1$

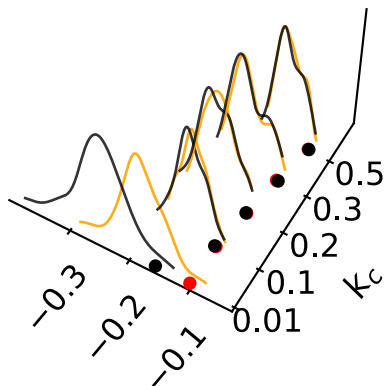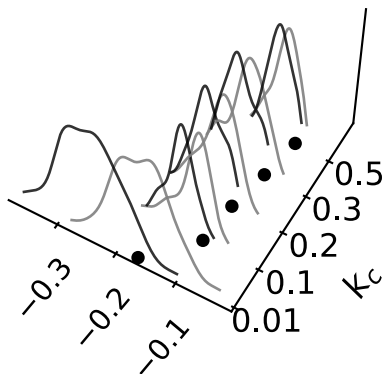

Supplement: supplementary_material [file attachment]

Independent  $Z$ ,  $w = 0.5$ , standardized

$dim_d = 2, n_c = 3$

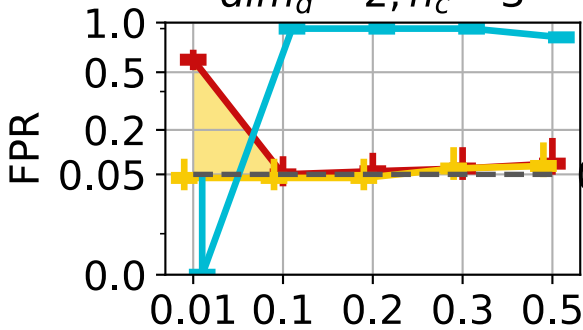

$dim_d = 2, n_c = 4$

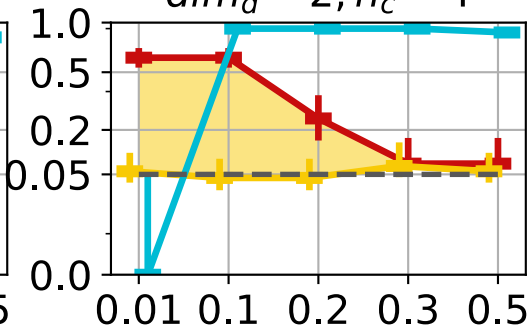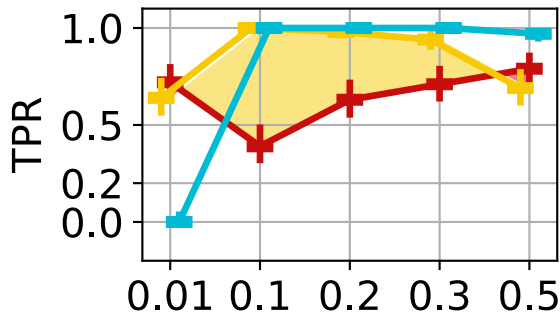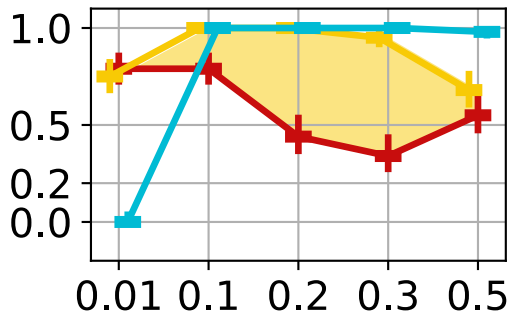

$k_c$

Supplement: supplementary_material [file attachment]

Confounder,  $w = 0.5$ , standardized,  $dim_c = 1$

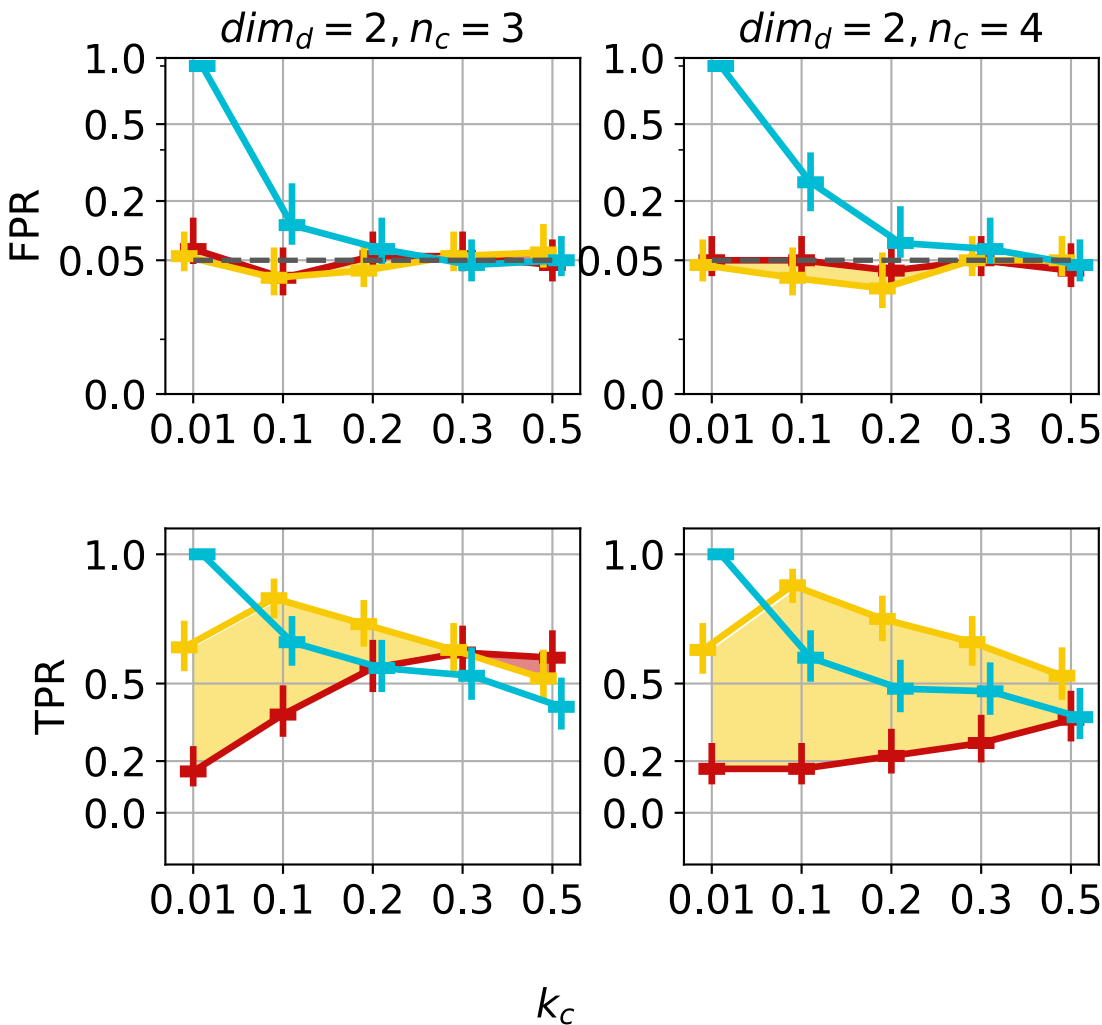

Supplement: supplementary_material [file attachment]

Independent  $Z$ ,  $w = 0.5$ , scaled  $(0, 1)$

$\dim_d = 2, n_c = 3$

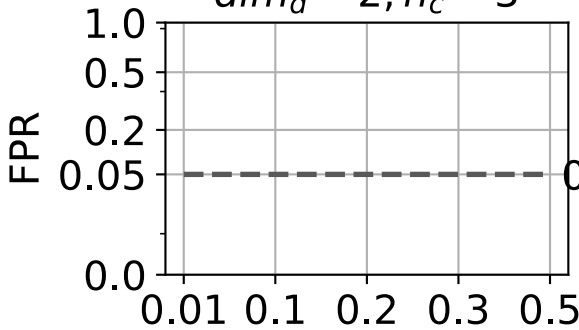

$\dim_d = 2, n_c = 4$

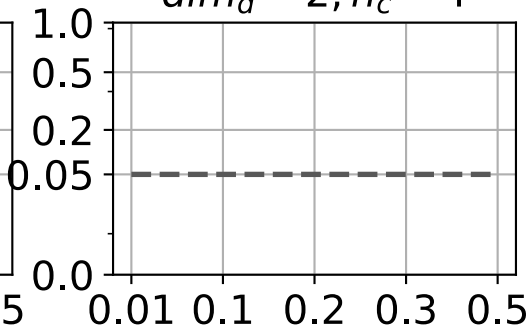

Supplement: supplementary_material [file attachment]

Independent  $Z$ ,  $w = 0.5$ , rank

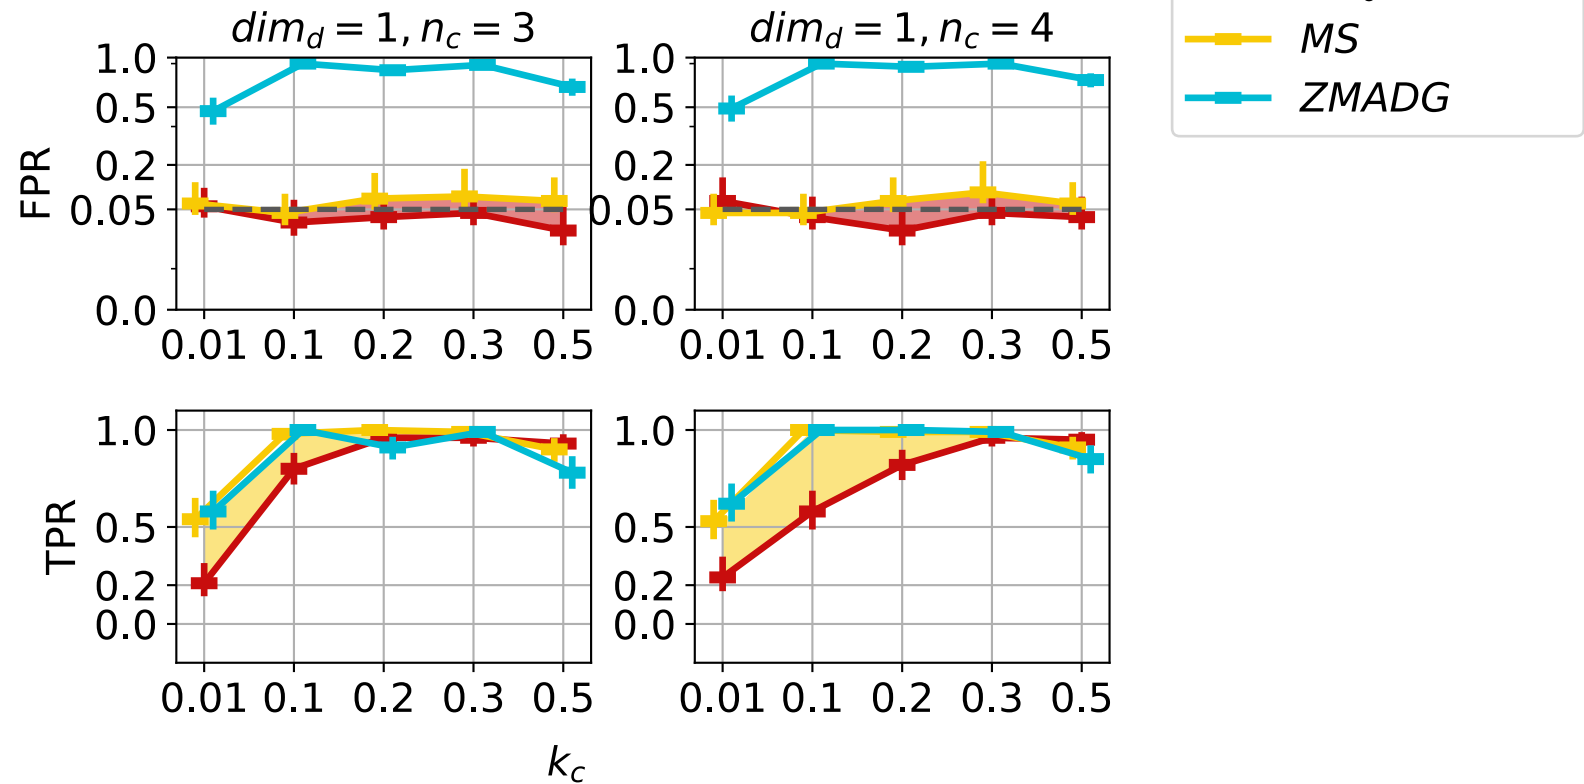

Supplement: supplementary_material [file attachment]

*MS*

Confounder,  $n=1000$ ,  $\dim_d=2$ ,  $\dim_c=1$ ,  $n_c=4$ , standardize

$H_0$

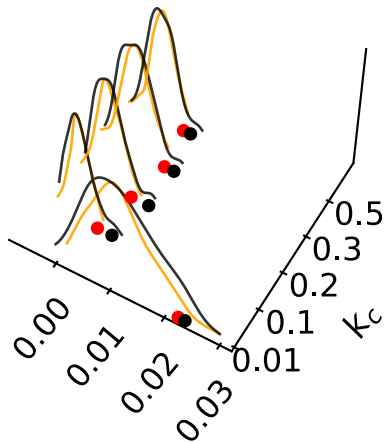

$H_1$

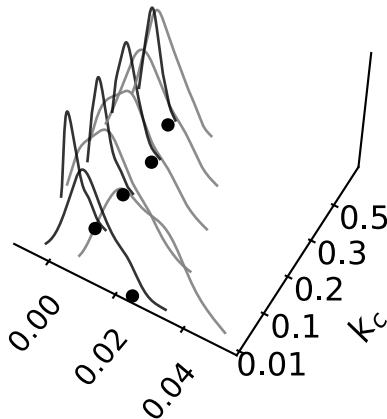

Supplement: supplementary_material [file attachment]

*MS*

Confounder,  $n=1000$ ,  $\dim_d=2$ ,  $\dim_c=1$ ,  $n_c=3$ , standardize

$H_0$

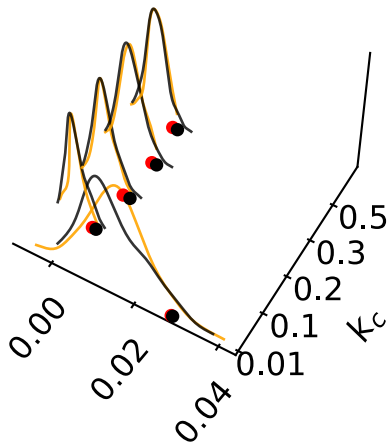

$H_1$

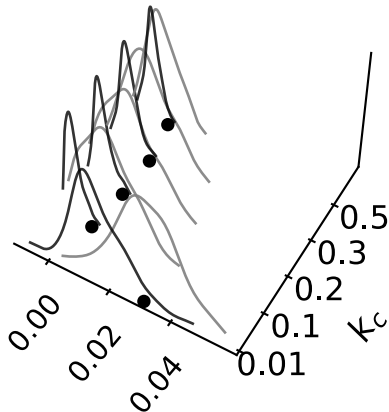

Supplement: supplementary_material [file attachment]

*MS*

Confounder,  $n=1000$ ,  $\dim_d=2$ ,  $\dim_c=1$ ,  $n_c=4$ , ranks

$H_0$

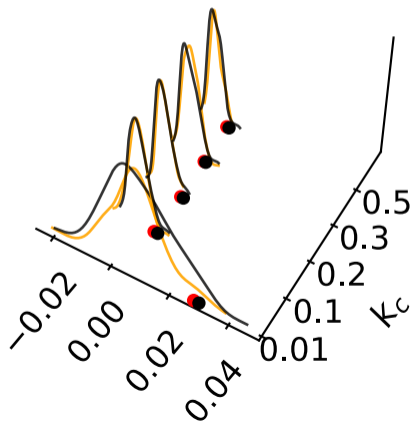

$H_1$

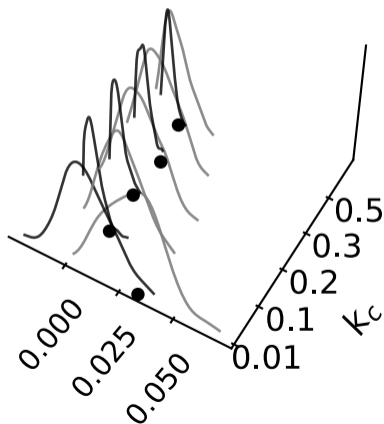

Supplement: supplementary_material [file attachment]

Chain,  $w = 0.5$ , rank

$\dim_d = 1, n_c = 3$

$\dim_d = 1, n_c = 4$

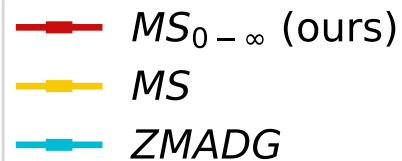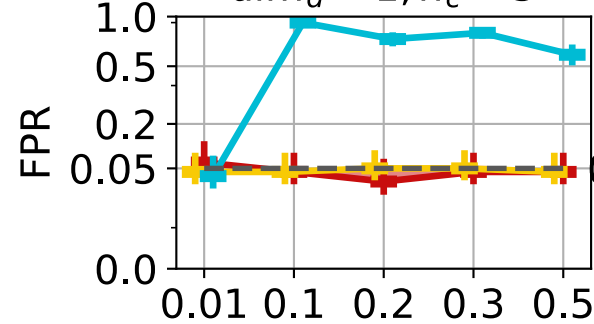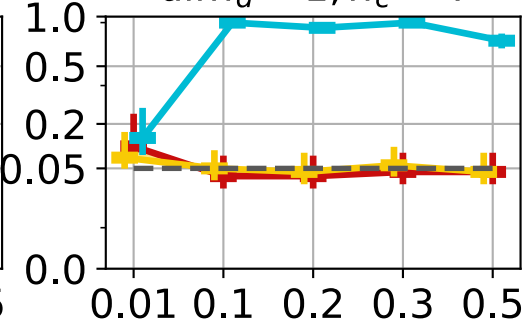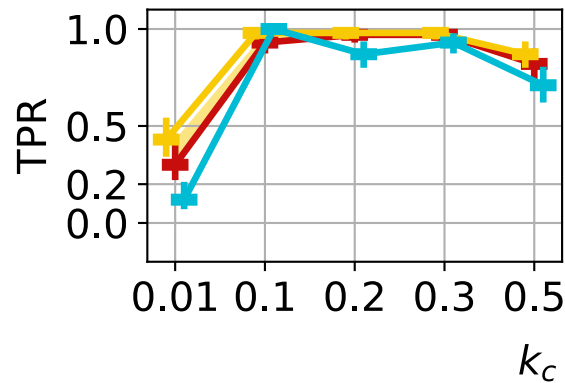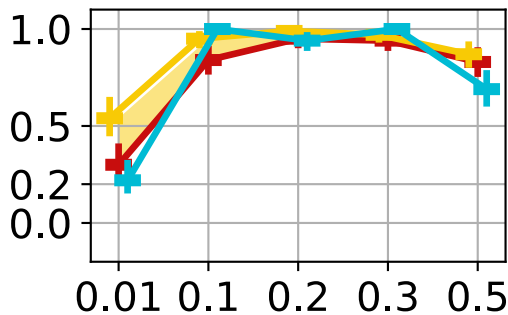

Supplement: supplementary_material [file attachment]

Confounder,  $w = 0.5$ , rank,  $\dim_c = 1$

$\dim_d = 1, n_c = 3$



$\dim_d = 1, n_c = 4$

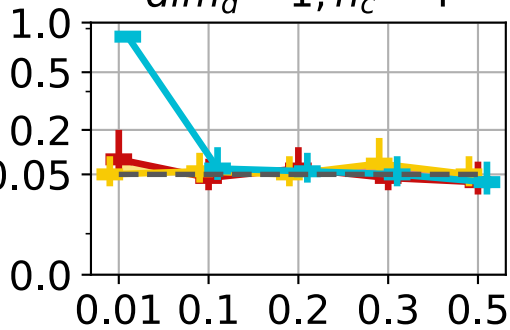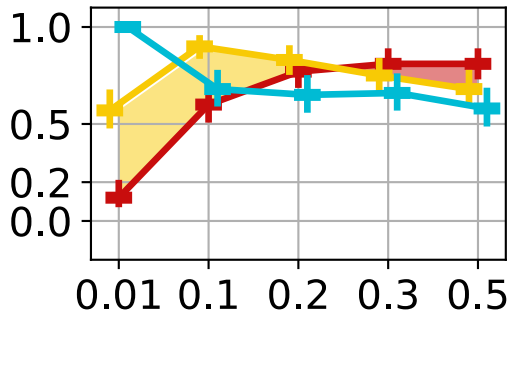

Supplement: supplementary_material [file attachment]

# ZMADG

Confounder,  $n=1000$ ,  $\dim_d=2$ ,  $\dim_c=1$ ,  $n_c=4$ , scale

$H_0$

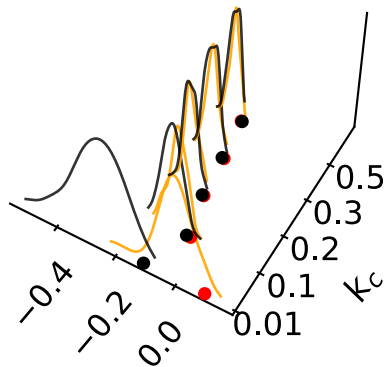

$H_1$

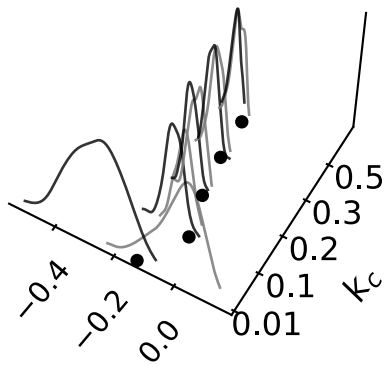

Supplement: supplementary_material [file attachment]

$MS$

Confounder,  $n=1000$ ,  $\dim_d=1$ ,  $\dim_c=1$ ,  $n_c=4$ , scale

$H_0$

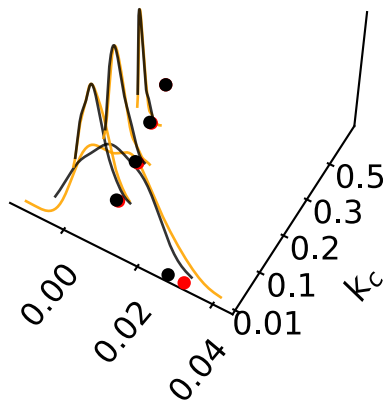

$H_1$

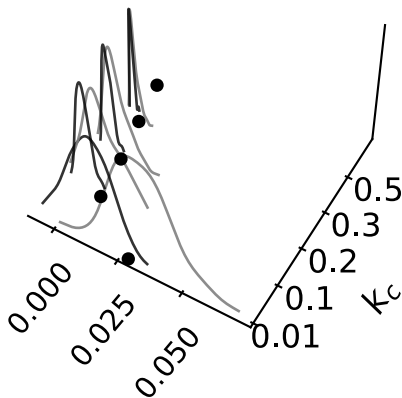

Supplement: supplementary_material [file attachment]

$MS_{0-\infty}$   
 Confounder,  $n=1000$ ,  $\dim_d=1$ ,  $\dim_c=1$ ,  $n_c=3$ , ranks

$H_0$

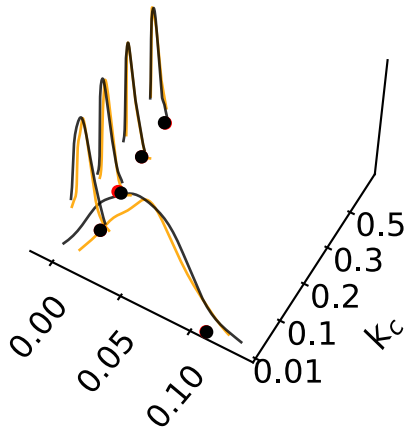

$H_1$

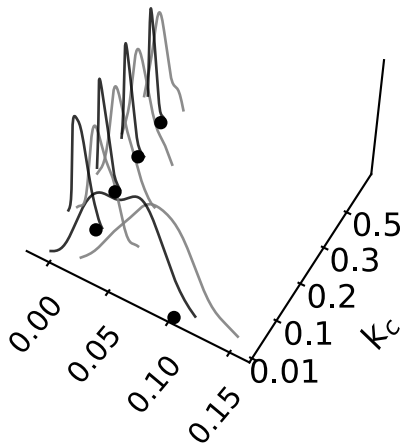

Supplement: supplementary_material [file attachment]

Independent  $Z$ ,  $w = 0.5$ , standardized

$dim_d = 1, n_c = 3$

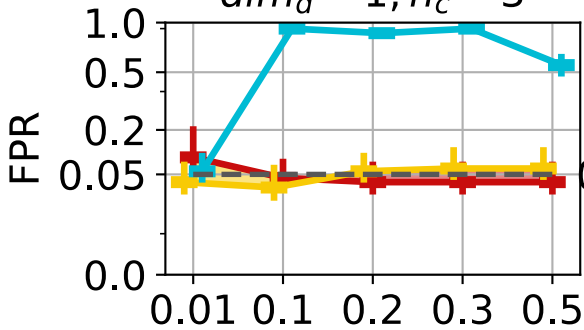

$dim_d = 1, n_c = 4$

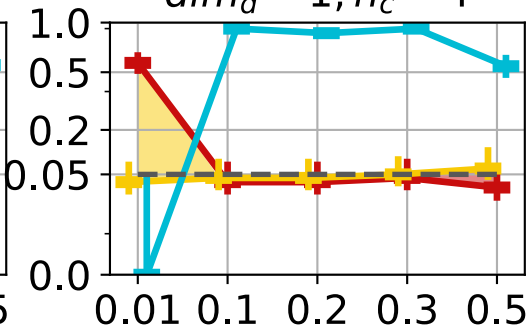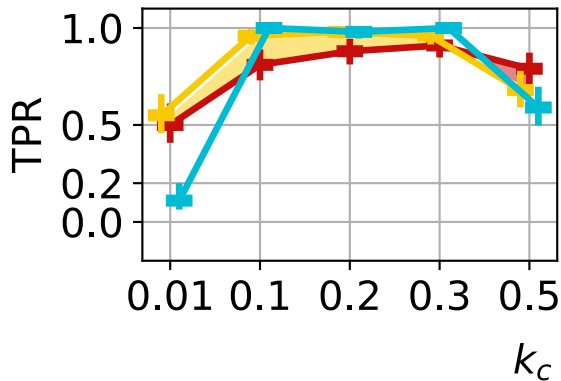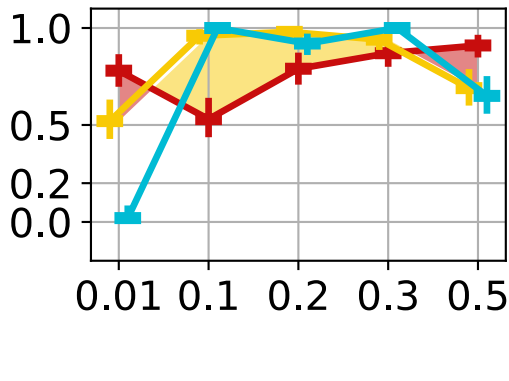

Supplement: supplementary_material [file attachment]
